1 Biosynthesis of  $\beta$ -(1 $\rightarrow$ 5)-Galactofuranosyl Chains of Fungal-Type and O-Mannose-Type

2 Galactomannans within the Invasive Pathogen *Aspergillus fumigatus*

3 Yuria Chihara<sup>a</sup>, Yutaka Tanaka<sup>b</sup>, Minoru Izumi<sup>c</sup>, Daisuke Hagiwara<sup>d</sup>, Akira Watanabe<sup>d</sup>,

4 Kaoru Takegawa<sup>c</sup>, Katsuhiko Kamei<sup>d</sup>, Nobuyuki Shibata<sup>b</sup>, Kazuyoshi Ohta<sup>a</sup> and Takuji

5 Oka<sup>a#</sup>

6 <sup>a</sup>Department of Applied Microbial Technology, Faculty of Biotechnology and Life Science,

7 Sojo University, Kumamoto, Japan

8 <sup>b</sup>Department of Infection and Host Defense, Tohoku Medical and Pharmaceutical University,

9 Sendai, Japan

10 <sup>c</sup>Graduate School of Environmental and Life Science, Okayama University, Okayama, Japan

11 <sup>d</sup>Medical Mycology Research Center, Chiba University, Chiba, Japan

12 <sup>e</sup>Department of Bioscience and Biotechnology, Faculty of Agriculture, Kyushu University,

13 Fukuoka, Japan

14 Y.C. and Y.T. contributed equally to this work.

15 <sup>#</sup>To whom correspondence should be addressed: Takuji Oka

16 Department of Applied Microbial Technology, Faculty of Biotechnology and Life Science,

17 Sojo University, Ikeda 4-22-1, Kumamoto 860-0082, Japan

18 Tel: +81 96 326 3986; Fax: +81 96 323 1330

19 E-mail: oka@bio.sojo-u.ac.jp

20 Running title:  $\beta$ -(1 $\rightarrow$ 5)-Galactofuranosyl Residues in *Aspergillus*

21 Keywords: *Aspergillus fumigatus*, cell wall, glycosyltransferase, galactomannan,

22 galactofuranose, glycosylation

23

24 **ABSTRACT**

25           The pathogenic fungus *Aspergillus fumigatus* contains galactomannans localized  
26 on the surface layer of its cell walls, which are involved in various biological processes.  
27 Galactomannans           comprise            $\alpha$ -(1→2)-/ $\alpha$ -(1→6)-mannan           and  
28  $\beta$ -(1→5)-/ $\beta$ -(1→6)-galactofuranosyl chains. We previously revealed that GfsA is a  
29  $\beta$ -galactofuranoside  $\beta$ -(1→5)-galactofuranosyltransferase involved in the biosynthesis of  
30  $\beta$ -(1→5)-galactofuranosyl chains. Here, we clarified the entire biosynthesis of  
31  $\beta$ -(1→5)-galactofuranosyl chains in *A. fumigatus*. Two paralogs exist within *A. fumigatus*:  
32 GfsB and GfsC. We show that GfsB and GfsC, in addition to GfsA, are  $\beta$ -galactofuranoside  
33  $\beta$ -(1→5)-galactofuranosyltransferases by biochemical and genetic analyses. GfsA, GfsB,  
34 and GfsC can synthesize  $\beta$ -(1→5)-galactofuranosyl oligomers up to lengths of 7, 3, and 5  
35 galactofuranoses within an established *in vitro* highly efficient assay of  
36 galactofuranosyltransferase activity. Structural analyses of galactomannans extracted from  
37 the strains  $\Delta gfsB$ ,  $\Delta gfsC$ ,  $\Delta gfsAC$ , and  $\Delta gfsABC$  revealed that GfsA and GfsC synthesized all  
38  $\beta$ -(1→5)-galactofuranosyl residues of fungal-type and O-mannose-type galactomannans,

39 and GfsB exhibited limited function in *A. fumigatus*. The loss of  $\beta$ -(1→5)-galactofuranosyl  
40 residues decreased the hyphal growth rate and conidia formation ability as well as increased  
41 the abnormal hyphal branching structure and cell surface hydrophobicity, but this loss is  
42 dispensable for sensitivity to antifungal agents and virulence toward immune-compromised  
43 mice.

44

45 **IMPORTANCE**

46  $\beta$ -(1→5)-galactofuranosyl residues are widely distributed in the subphylum  
47 Pezizomycotina of the phylum Ascomycota. Pezizomycotina includes many plant and animal  
48 pathogens. Although the structure of  $\beta$ -(1→5)-galactofuranosyl residues of galactomannans  
49 in filamentous fungi was discovered long ago, it remains unclear which enzyme is  
50 responsible for biosynthesis of this glycan. Fungal cell wall formation processes are  
51 complicated, and information concerning glycosyltransferases is essential for their  
52 understanding. In this study, we show that GfsA and GfsC are responsible for the  
53 biosynthesis of all  $\beta$ -(1→5)-galactofuranosyl residues of fungal-type and O-mannose-type  
54 galactomannans. The data presented here indicates that  $\beta$ -(1→5)-galactofuranosyl residues  
55 are involved in cell growth, conidiation, polarity, and cell surface hydrophobicity. Our new  
56 understanding of  $\beta$ -(1→5)-galactofuranosyl residue biosynthesis provides important novel  
57 insights into the formation of the complex cell wall structure and the virulence of the  
58 subphylum Pezizomycotina.

59

## 60 INTRODUCTION

61           The cell wall of the pathogenic fungus *Aspergillus fumigatus* comprises several  
62 kinds of polysaccharides including chitin,  $\beta$ -(1→3)-glucan,  $\beta$ -(1→3)-/ $\beta$ -(1→4)-glucan,  
63  $\alpha$ -(1→3)-glucan, galactosaminogalactan, and galactomannans (GMs) (1–3). These  
64 polysaccharides are complexly intertwined to form the three-dimensional structure of cell  
65 walls (1, 2). GMs are polysaccharides comprising D-mannose (Man) and D-galactofuranose  
66 (Gal<sub>f</sub>), localized on the surface layer of cell walls (2), and distinguished into fungal-type  
67 galactomannan (FTGM) and O-mannose-type galactomannan (OMGM) (4). FTGM includes  
68 core-mannan, a structure wherein  $\alpha$ -(1→2)-mannotetraose is linked with  $\alpha$ -(1→6)-linkage  
69 from 9 to 10, and  $\beta$ -(1→5)-/ $\beta$ -(1→6)-galactofuran side chains (5, 6). FTGM binds to a  
70 glycosylphosphatidylinositol anchor for transportation from the Golgi apparatus to the cell  
71 surface (7), and the transported FTGM is incorporated into the  $\beta$ -(1→3)-glucan–chitin core  
72 of the cell wall by *DFG* family proteins (8). OMGM structure comprises  
73  $\beta$ -(1→5)-/ $\beta$ -(1→6)-galactofuranosyl chains bonded to an O-Man-type glycan with a  
74 structure wherein Man is bonded to serine/threonine of a protein as a basic skeleton (6, 9).

75 Information on GM biosynthesis has been more thoroughly investigated recently  
76 (3, 10, 11). CmsA/Ktr4 has been reported to be an  $\alpha$ -(1→2)-mannosyltransferase involved in  
77 the biosynthesis of the  $\alpha$ -(1→2)-mannan backbone of FTGM (12, 13). In the gene-disrupted  
78 strain of *cmsA/ktr4* and/or its homolog *cmsB/ktr7*, pronounced hyphal elongation  
79 suppression and conidia formation failure were observed (12, 13). Moreover, the  $\Delta$ *cmsA/ktr4*  
80 mutant was significantly less virulent than the parental strain (13). These data indicate that  
81 FTGM is crucial for normal cell growth and virulence (12, 13). GfsA is firstly identified as a  
82 galactofuranosyltransferase involved in the biosynthesis of OMGM galactofuranosyl  
83 residues (14). GfsA is a  $\beta$ -galactofuranoside  $\beta$ -(1→5)-galactofuranosyltransferase also  
84 involved in the biosynthesis of FTGM galactofuran side chains (4). However, in the  $\Delta$ *gfsA*  
85 strain of *A. fumigatus*, the  $\beta$ -(1→5)-galactofuranosyl residue was not completely lost (4). The  
86 biosynthesis of the remaining  $\beta$ -(1→5)-galactofuranosyl residues remain unclear. Therefore,  
87 we focused on clarifying which residual  $\beta$ -(1→5)-galactofuranosyl residues are  
88 biosynthesized. There are two paralogs GfsB and GfsC in *A. fumigatus*. We evaluated  
89 whether GfsB and GfsC are responsible for biosynthesis of the remaining

90  $\beta$ -(1→5)-galactofuranosyl residues. We obtained recombinant proteins of GfsA, GfsB, and  
91 GfsC to elucidate galactofuranoside chain biosynthesis activity *in vitro* using an established  
92 highly efficient assay of galactofuranosyltransferase activity. Furthermore, to investigate the  
93 function of *gfs* family proteins *in vivo*, we analyzed the structure of GM extracted from  
94 single, double, and triple gene-disruptants of *gfsA*, *gfsB*, and *gfsC*. In this study, we aimed to  
95 clarify the biosynthesis and function of  $\beta$ -(1→5)-galactofuranosyl residues in *A. fumigatus*.

96

## 97 **RESULTS**

98 **Features of GfsB and GfsC in *A. fumigatus*.** The  $\Delta$ *gfsA* disruptant exhibited reduction of  
99 the content of  $\beta$ -(1→5)-galactofuranosyl residues within FTGM and OMGM (4); however,  
100 these residues remained within the galactomannan fractions. To determine the enzyme  
101 synthesizing the remaining  $\beta$ -(1→5)-galactofuranosyl residues, we focused on *gfsA* paralogs,  
102 termed *gfsB* (Afu4g13710 in *A. fumigatus*; Af293/AFUB\_070620 in *A. fumigatus* A1163)  
103 and *gfsC* (Afu4g10170/AFUB\_067290). Comparison of cDNA and genome sequences  
104 revealed that no introns were present in *gfsB* and *gfsC*, similarly to *gfsA* (4, 14). Analysis of



105 secondary structures using TMHMM revealed that GfsB and GfsC have putative  
106 transmembrane domains (GfsB: amino acids 13–35, GfsC: amino acids 23–42) at their  
107 *N*-termini, suggesting that both GfsB and GfsC are type II membrane proteins, indicating  
108 GfsB and GfsC localization at the Golgi apparatus like GfsA (3, 14). GfsB and GfsC have a  
109 conserved metal-binding DXD motif (GfsB: amino acids 237–239, GfsC: amino acids 240–  
110 242).

111 **Enzymatic function of GfsA, GfsB, and GfsC.** We previously constructed an *Escherichia*  
112 *coli* strain expressing a recombinant GfsA protein. GfsC was successfully expressed as a  
113 soluble protein using a cold-shock expression vector and GfsB was obtained as a soluble  
114 fused NusA protein using an *E. coli* expression system. Recombinant 6× His-tagged GfsA,  
115 GfsB, and GfsC proteins were purified by Ni<sup>+</sup> affinity chromatography and analyzed using  
116 SDS-PAGE (Fig. S1). The NusA tag of GfsB was cleaved with a HRV 3C protease and  
117 removed by Ni-agarose. GfsA, GfsB, and GfsC were visualized as bands close to their  
118 predicted respective molecular weights of 57.9, 50.3, and 52.0 kDa. For the  
119 galactofuranosyltransferase assay it is essential to use UDP-Gal<sub>f</sub> as a sugar donor; however, it

120 is difficult to obtain as it is not commercially available. Thus, we biochemically synthesized  
121 UDP-Gal<sub>f</sub> using Glf, a UDP-galctopyranose (Gal<sub>p</sub>) mutase derived from *E. coli*, followed by  
122 HPLC purification (15, 16). This purified UDP-Gal<sub>f</sub> was used for the assay within our  
123 previous study (4, 14). Because enzymatic equilibrium of the reversible enzyme Glf is  
124 inclined to be >93% of the mixture (16), generating much UDP-Gal<sub>f</sub> was difficult. To solve  
125 this problem, we attempted to improve the galactofuranosyltransferase assay (Fig. 1A).  
126 When a small amount of UDP-Gal<sub>f</sub> generated is consumed by galactofuranosyltransferase,  
127 Glf regenerates UDP-Gal<sub>f</sub> to maintain equilibrium (Fig. 1A). Glf oxidizes FADH<sub>2</sub> to FAD  
128 when converting UDP-Gal<sub>p</sub> to UDP-Gal<sub>f</sub>. Therefore, reducing FAD to FADH<sub>2</sub> is essential for  
129 a continuous reaction (Fig. 1A). Sodium dithionite (SD) was used for re-reduction of FADH<sub>2</sub>  
130 from FAD. Dithionite ion plays a role as a driving horse for proceeding to  
131 galactofuranosylation by FADH<sub>2</sub> reduction from FAD within the continuous reaction, which  
132 continues until UDP-Gal<sub>p</sub> is almost lost. Based on this principle, we developed a highly  
133 efficient assay for galactofuranosyltransferase activity using Glf and Gfs proteins (Fig. 1A).  
134 Chemically synthesized 4-methylumbelliferyl-β-D-galactofuranoside (4MU-β-D-Gal<sub>f</sub>) or

135 *p*-nitrophenyl- $\beta$ -D-galactofuranoside (pNP- $\beta$ -D-Gal<sub>f</sub>) was used as acceptor substrate (17, 18).  
136 When commercially available pNP- $\beta$ -D-Gal<sub>f</sub> was used as an acceptor substrate instead of  
137 4MU- $\beta$ -D-Gal<sub>f</sub>, pNP- $\beta$ -D-Gal<sub>f</sub> was not detected by UV300 absorbance, suggesting  
138 pNP- $\beta$ -D-Gal<sub>f</sub> variance within the structure by SD (19) (Fig. S2 (d) and (e)). Although  
139 NADH/NADPH instead of SD could be used as a reducing reagent against FAD, SD  
140 promoted galactofuranosyltransferase reaction more effectively than NADH/NADPH (Fig.  
141 S2 (c) and (f)).

142 GfsA-lacking fraction showed no new peak generation, but fractions with GfsA  
143 showed six new peaks at 18.0, 20.4, 23.4, 26.5, 30.2, and 34.3 min (defined as AG2–AG7,  
144 respectively; Fig. 1B, *upper panels*). GfsB-lacking fraction showed no new peak generation,  
145 but fractions with GfsB had two new peaks at 18.0 and 20.4 min (BG2 and BG3,  
146 respectively; Fig. 1B, *middle panels*). GfsC-lacking fraction showed no new peak generation,  
147 but fractions with GfsC had four new peaks at 18.0, 20.4, 23.4, and 26.5 min (CG2–CG5,  
148 respectively; Fig. 1B, *bottom panels*). Table 1 shows the mass-to-charge ratios (*m/z*) of  
149 enzymatic products of GfsA, GfsB, and GfsC as identified by LC/MS. The differences of

150 each peak were calculated as 162.1, indicating that a hexose molecule is continuously  
151 attached and each peak was identical to the theoretical molecular mass of the molecule  
152 sequentially added to 4MU- $\beta$ -D-Gal<sub>f</sub> by Gal<sub>f</sub>.

153 To further determine chemical structure, we collected >1 mg of AG3, BG2, and  
154 CG3 with HPLC and analyzed the sample using <sup>1</sup>H-NMR (Fig. 2) with 4MU- $\beta$ -D-Gal<sub>f</sub> as a  
155 control. Chemical shift values for H-1 position of the Gal<sub>f</sub> residue in  
156 t-Gal<sub>f</sub>- $\beta$ -(1→5)-Gal<sub>f</sub>- $\beta$ -(1→5)-Gal<sub>f</sub>-D- $\beta$ -4MU structures are 5.22 (signal A), 5.20 (signal B),  
157 and 5.79 (signal C) ppm from the non-reducing end, according to previous reports (4, 6).  
158 Signals for AG3, BG2, and CG3 were in agreement with the reported chemical shift values  
159 (Fig. 2). To obtain further evidence for glycosidic linkage, we collected 500  $\mu$ g of AG3, AG4,  
160 BG2, CG3, and CG4 using HPLC and analyzed the sample using methylation analysis for  
161 each compound. This sample was methylated then hydrolyzed, and subsequently analyzed by  
162 GC-MS (Fig. 3). The retention times for t-Gal<sub>f</sub>→, 5-Gal<sub>f</sub>1→ and 6-Gal<sub>f</sub>1→ were 16.36,  
163 18.40, and 19.56 min, respectively, under these analysis conditions (6, 20). AG3, AG4, BG2,  
164 CG3, and CG4 displayed a peak at 16.36 min (Fig. 3), indicating presence of terminal Gal<sub>f</sub>

165 residues. In addition, AG3, AG4, BG2, CG3, and CG4 had a peak at 18.40 but not 19.56 min  
166 (Fig. 3), indicating that the all added Gal<sub>f</sub> residue was attached to the C-5 position of the first  
167 Gal<sub>f</sub> residue. These results indicate that GfsB and GfsC are also  
168 β-(1→5)-galactofuranosyltransferases and that GfsA, GfsB, and GfsC could not transfer a  
169 Gal<sub>f</sub> residue to the C-6 position in contrast to GlfT2, the bacterial  
170 β-(1→5)-/β-(1→6)-galactofuranosyltransferase (21, 22).

171

172 **Role of GfsB and GfsC in GM biosynthesis.** To clarify the function of the *gfs* family *in vivo*,  
173 we constructed  $\Delta gfsB$ ,  $\Delta gfsC$ ,  $\Delta gfsC::C$ ,  $\Delta gfsAC$ , and  $\Delta gfsABC$  strains (Fig. S3, S4 and S5).  
174 To identify the effect of gene disruption on the structure of GMs, those extracted from the  
175 mycelia of *A. fumigatus* strains were purified by cetyl trimethyl ammonium bromide  
176 precipitation with boric acid buffer. The GMs designated as FTGM+OMGM contain both  
177 FTGM and OMGM (4); these were analyzed by <sup>13</sup>C-NMR spectroscopy (Fig. 4). Signals at  
178 107.87 ppm and 108.70 ppm of the <sup>13</sup>C-NMR spectra represent the C-1 positions of the  
179 underlined Gal<sub>f</sub> residue within the structure of Gal<sub>f</sub>-β-(1→5)-Gal<sub>f</sub>-(1→(β-(1→5)-Gal<sub>f</sub>)) and

180  $\beta$ -Gal<sub>f</sub>-β-(1→6)-Gal<sub>f</sub>-(1→(β-1→6)-Gal<sub>f</sub>), respectively, as according to previous reports (6,  
181 23). The signal intensity of β-(1→5)-Gal<sub>f</sub> was higher than that of β-(1→6)-Gal<sub>f</sub> in the  
182 <sup>13</sup>C-NMR chart of A1151-FTGM+OMGM. Within Δ*gfsB*-FTGM+OMGM there was little  
183 difference from A1151-FTGM+OMGM (Fig. 4). In contrast, the intensity of signal of  
184 β-(1→5)-Gal<sub>f</sub> was inversed in the <sup>13</sup>C-NMR chart of Δ*gfsC*-FTGM+OMGM, indicating that  
185 the amount of β-(1→5)-Gal<sub>f</sub> was decreased in the FTGM+OMGM fraction of Δ*gfsC* strains  
186 (Fig. 4). The signal intensity of β-(1→5)-Gal<sub>f</sub> was recovered in the <sup>13</sup>C-NMR chart of  
187 Δ*gfsC*::*C*-FTGM+OMGM (Fig. 4). Interestingly, signals of β-(1→5)-Gal<sub>f</sub> in the <sup>13</sup>C-NMR  
188 chart of Δ*gfsAC*-/Δ*gfsABC*-FTGM+OMGM were not detected, indicating that β-(1→5)-Gal<sub>f</sub>  
189 disappeared within the FTGM+OMGM fractions of Δ*gfsAC* and Δ*gfsABC* strains. GC-MS  
190 analyses of O-methylalditol acetates derived from methylation analyses of FTGM+OMGMs  
191 were performed for the A1151, Δ*gfsB*, Δ*gfsC*, Δ*gfsAC*, Δ*gfsABC*, and Δ*gfsC*::*C* strains  
192 (Table 2). The ratio of the 5-O-substituted Gal<sub>f</sub> residue (5-Gal<sub>f</sub>1→) of Δ*gfsC* (2.16% ±  
193 0.19%) was lower than that of A1151 (16.31% ± 0.84%); however, the ratio of 5-Gal<sub>f</sub>1→ of  
194 Δ*gfsB* (15.37% ± 0.71%) was comparable with that of A1151 (Table 2). Interestingly, signals

195 for the 5-Gal<sub>7</sub>1→ of  $\Delta gfsAC$  or  $\Delta gfsABC$  were not detected within these FTGM+OMGM  
196 fractions (Table 2). These results clearly indicate that  $\beta$ -(1→5)-galactofuranosyl residues  
197 disappeared within both  $\Delta gfsAC$  and  $\Delta gfsABC$ . Next, the FTGM galactofuran side chain was  
198 prepared and separated by gel filtration chromatography to analyze its length (Fig. 5).  
199 FTGM+OMGM fractions were treated with 0.15 M of trifluoroacetic acid at 100°C for 15  
200 min. The resultant samples were applied to gel filtration chromatography to separate the  
201 obtained galactofuran side chain (Fig. 5). Consequently, sugar chains consisting of up to 6  
202 monosaccharides were detected in the fractions of A1151,  $\Delta gfsA$  and  $\Delta gfsC$  strains (Fig. 5).  
203 Conversely, only monosaccharide was detected in the  $\Delta gfsAC$  strain fraction, indicating that  
204 elongation by  $\beta$ -(1→5)-galactofuranosyl residues had not occurred (Fig. 5). These  
205 observations clearly indicate that all  $\beta$ -(1→5)-galactofuranosyl residues of FTGM and  
206 OMGM in *A. fumigatus* are biosynthesized by GfsA and GfsC.

207

208 **Phenotypic analyses of disruptant *gfs* family genes.** The colony phenotypes of disruptant

209 strains were observed following 3 days of growth at 37°C/50°C on minimal medium (Fig. 6).

210 The colony growth rates of the disruptant strains are shown in Table 3. The colony growth

211 rate of the  $\Delta gfsA$  strain decreased to 85.2% as compared with that of the A1151 strain at 37°C

212 (Table 3). In contrast, colony growth rate percentages of  $\Delta gfsB$  and  $\Delta gfsC$  strains were

213 comparable with that of the A1151 strain at 37°C (Table 3). Growth rate percentages of

214  $\Delta gfsAC$  and  $\Delta gfsABC$  strains were reduced to 68.4% and 67.8% at 37°C, and to 86.4% and

215 84.0% at 50°C, respectively (Table 3). When quantifying the number of formed conidia at

216 37°C, the percentage of the  $\Delta gfsA$  strain decreased to 50.9% compared with that of the

217 A1151 strain. The conidiation efficiencies of  $\Delta gfsAC$  and  $\Delta gfsABC$  were reduced to

218 approximately 32.1% and 25.4% of that of the A1151 strain (Table 4). In contrast, the

219 conidiation efficiency of the  $\Delta gfsB$  and  $\Delta gfsC$  strains did not obviously decrease (Table 4).

220 These results are consistent with the facts that GfsA and GfsC have redundant enzymatic

221 functions and GfsB can only synthesize short  $\beta$ -(1→5)-galactofuranosyl oligomers. These

222 results indicate that the  $\beta$ -(1→5)-galactofuranosyl residues plays an important role in conidia

223 formation and hyphal growth.



224           It was reported that hyphae branching was increasing within the  $\Delta glfA$  strain (24).  
225   Therefore, we observed hyphae in  $\Delta gfsAC$  and  $\Delta gfsABC$  strains to determine whether  
226   abnormal hyphae branching was also formed in these strains (Fig. 7A). We did observe  
227   abnormal hyphae branching at a high frequency, indicating that deficient of  
228    $\beta$ -(1 $\rightarrow$ 5)-galactofuranosyl residues causes an increase of abnormal hyphae branching.  
229   Reportedly, lack of the Gal<sub>f</sub>-containing sugar chains from the cell causes increased cell  
230   surface hydrophobicity (24). To confirm increasing cell surface hydrophobicity in  $\Delta gfsAC$   
231   and  $\Delta gfsABC$  strains, whether the amount of adherence of latex beads to the mycelium  
232   increased as observed within the  $\Delta glfA$  strain was determined; this adherence was clearly  
233   increased (Fig. 7B), indicating that  $\beta$ -(1 $\rightarrow$ 5)-galactofuranosyl residues are involved in cell  
234   surface hydrophobicity in *A. fumigatus*.

235

236   **Sensitivity to antifungal agents and virulence of  $\beta$ -(1 $\rightarrow$ 5)-galactofuranosyl**  
237   **residue-deficient strains.** Next, we tested the sensitivity of the A1151,  $\Delta gfsC$ ,  $\Delta gfsAC$ , and  
238    $\Delta gfsABC$  strains to the widely used clinical antifungal agents micafungin (MCFG),

239 caspofungin (CPFG), amphotericin B (AMPH-B), flucytosine (5-FC), fluconazole (FLCZ),  
240 itraconazole (ITCZ), voriconazole (VRCZ), and miconazole (MCZ) (Table 5). Sensitivities  
241 of the mutants to antifungal agents were almost identical to those of A1151. The  $\Delta gfsABC$   
242 strain exhibited only slightly greater sensitivity to AMPH-B and MCZ as compared with the  
243 A1151 strain (Table 5). We also examined the role of  $\beta$ -(1 $\rightarrow$ 5)-galactofuranosyl residues in  
244 pathogenesis using a murine infection model (Fig. 8). First, the virulence of A1151,  $\Delta gfsC$   
245 and  $\Delta gfsC::C$  strains were tested within immune-compromised mice. Survival rates did not  
246 differ between A1151,  $\Delta gfsC$  and  $\Delta gfsC::C$  infections (Fig. 8A). Virulence of A1151,  $\Delta gfsC$ ,  
247  $\Delta gfsAC$ , and  $\Delta gfsABC$  strains were also tested (Fig. 8B). In the aspergillosis model, virulence  
248 of the  $\Delta gfsAC$  and  $\Delta gfsABC$  strains were comparable with that of the A1151 strain (Fig. 8B),  
249 indicating that a lack of  $\beta$ -(1 $\rightarrow$ 5)-galactofuranosyl residues did not influence survival rates  
250 of immunosuppressed mice.

251

252 **DISCUSSION**

253           We previously characterized that GfsA is the  $\beta$ -galactofuranoside  
254  $\beta$ -(1 $\rightarrow$ 5)-galactofutanosyltransferase (4). However, the  $\beta$ -(1 $\rightarrow$ 5)-galactofuranosyl oligomer  
255 synthesized with GfsA could only be confirmed to generate up to 3 sugars in the previous  
256 reaction system due to a lack of commercially available UDP-Gal<sub>f</sub> (4). In this study, we  
257 showed that GfsA could synthesize  $\beta$ -(1 $\rightarrow$ 5)-galactofuranosyl oligomers up to lengths of 7  
258 monosaccharides (Fig. 1, *upper panels*). In addition, we showed that GfsB and GfsC also  
259 could transfer  $\beta$ -Gal<sub>f</sub> to the 5 position of the hydroxy group of the terminal  
260  $\beta$ -galactofuranosyl residue up to 3 and 5 monosaccharides lengths, respectively (Fig. 1,  
261 *middle and bottom panels*). AG4, BG2 and CG3 accumulated within the assay of GfsA, GfsB  
262 and GfsC, respectively (Fig. 1). This indicates that GfsA is a more suitable enzyme for  
263 synthesizing longer  $\beta$ -(1 $\rightarrow$ 5)-galactofuranosyl oligomers compared with GfsB and GfsC.  
264 This result is consistent with the fact that *gfsA* disruption had greatest impact in the  
265 disruptants of *gfs* family genes (Fig. 6). We subsequently proposed structures of the  
266 fungal-type- and O-mannose-type galactomannans in the  $\Delta$ *gfsAC* strain (Fig. 9).

267           One problematic issue for assaying galactofuranosyltransferases is that the sugar  
268 donor UDP-Gal<sub>f</sub> is not commercially available. Errey et al. described relatively easily  
269 synthesizing UDP-Gal<sub>f</sub> using flexible enzymatic and chemo-enzymatic approaches (25).  
270 However, obtaining and retaining the chemically unstable UDP-Gal<sub>f</sub> remains complicated  
271 (26). We thus attempted to establish a galactofuranosyltransferase assay using a continuous  
272 reaction of sugar-nucleotide conversion and sugar transfer with UDP-galactopyranose  
273 mutase and galactofuranosyltransferase. Rose et al. previously performed a method to detect  
274 galactofuranosyltransferase activity via continuous reaction using NADH for the reduction  
275 of FAD (27). In our hands galactofuranosylation proceeded even when NADH/NADPH was  
276 used instead of SD, but was more efficient with SD versus NADH/NADPH (Fig. S2). This  
277 established method could measure galactofuranosyltransferase activity without UDP-Gal<sub>f</sub>. In  
278 addition, since a sufficient amount of purified product can be separated and purified, this is  
279 advantageous for structural analysis of the enzymatic product (Figs. 2 and 3). This method  
280 will likely be useful for functional analysis of other galactofuranosyltransferases.

281           The growth phenotypes of the  $\Delta gfsA$  strain are less severe than that of  
282 the  $\Delta gfsAC/\Delta gfsABC$  strains (Fig. 6, Tables 3 and 4). Deletion of *gfsB* and *gfsC* did not  
283 result in any growth defect of *A. fumigatus* (Fig. 6, Tables 3 and 4). Very recently, similar  
284 results have been observed within disrupted strains of *gfs* family genes in *A. niger* (28),  
285 suggesting that existence of a common functional relationships of the *gfs* family proteins for  
286 *A. niger* and *A. fumigatus*. We clarified that the phenotypic abnormalities occurring in the  
287  $\Delta gfsAC$  strain were due to defects in  $\beta$ -(1 $\rightarrow$ 5)-galactofuranosyl residues via analysis of the  
288 sugar chain structure of the  $\Delta gfsAC$  strain.

289           Several galactofuranosyl sugar chain-absent mutants have been reported in *A.*  
290 *fumigatus*; whole galactofurnosyl sugar chains are absent within  $\Delta glfA$  and  $\Delta glfB$  strains  
291 (24, 29, 30). These absent Gal<sub>f</sub> residues caused decreased growth rates, abnormal hyphae  
292 branching, thinner cell walls, increased susceptibility to several antifungal agents and  
293 increased adhesive phenotype as compared with the parental strain (24, 29, 30). The  
294 phenotypes of the  $\Delta gfsAC/\Delta gfsABC$  strains were similar in some aspects to the  $\Delta glfA$  strain,  
295 but not identical. The latter showed stronger inhibition of hyphal growth and conidia

296 formation compared with  $\Delta gfsAC/\Delta gfsABC$  (Fig. 6). This is because galactofuranosyl  
297 residues are  $\beta$ -(1 $\rightarrow$ 5)-linked,  $\beta$ -(1 $\rightarrow$ 2)-linked,  $\beta$ -(1 $\rightarrow$ 3)-linked, and  $\beta$ -(1 $\rightarrow$ 6)-linked sugars  
298 (5, 6, 10). These Gal<sub>f</sub> residues, except  $\beta$ -(1 $\rightarrow$ 5)-galactofuranosyl, are found in glycosyl  
299 phosphoinositolceramides (GIPC), FTGM, OMGM, and other sugar chains (5, 6, 10, 31–33)  
300 and might be involved in biological events. Only the  $\beta$ -(1 $\rightarrow$ 5)-galactofuranosyl residues  
301 disappear in the  $\Delta gfsAC/\Delta gfsABC$  strains, thus it seems reasonable that they exhibit less  
302 influence than the  $\Delta glfA$  strain, wherein all Gal<sub>f</sub>-containing sugar chain is lost. However,  
303 abnormal branching of the hyphae and cell surface hydrophobicity were not significantly  
304 different between the  $\Delta gfsAC$ ,  $\Delta gfsABC$ , and  $\Delta glfA$  strains (Fig. 7), indicating that GM  
305  $\beta$ -(1 $\rightarrow$ 5)-galactofuranosyl residues' functions are heavily involved in normal polarity of the  
306 hyphae and cell surface hydrophobicity.

307           The presence of the  $\beta$ -(1 $\rightarrow$ 6)-galactofuranosyl moiety has been reported in the  
308 galactofuran side chain of FTGM and OMGM in *A. fumigatus*. We, therefore, predicted that  
309 if the  $\beta$ -(1 $\rightarrow$ 5)-galactofuranosyl residues disappeared so would the  
310  $\beta$ -(1 $\rightarrow$ 6)-galactofuranosyl residues. However, upon disappearance of the

311  $\beta$ -(1→5)-galactofuranosyl residues the  $\beta$ -(1→6)-galactofuranosyl residues remained  
312 detectable within the  $^{13}\text{C}$ -NMR of GMs from the  $\Delta gfsAC$  strain (Fig. 4). This strongly  
313 suggests the existence of a  $\beta$ -(1→6)-galactofuranosyl oligomer and/or polymer other than the  
314  $\beta$ -(1→6)-galactofuranosyl moiety of the FTGM galactofuran side chain.  
315  $\beta$ -(1→6)-Galactofuranosyl polymer was found in *Fusarium* sp., but not in *A. fumigatus* (34–  
316 36).

317 In the mouse infection model of invasive aspergillosis, the lack of GM  
318  $\beta$ -(1→5)-galactofuranosyl residues exhibited no significant differences in virulence for the  
319 A1151,  $\Delta gfsAC$  and  $\Delta gfsABC$  strains. These findings were consistent with Lamarre's  
320 findings that disruption of *glfA* has no effect on virulence (24). In contrast, Schmalhorst et al.  
321 reported that disruption of *glfA* resulted in attenuated virulence in mouse model of invasive  
322 aspergillosis (29). Recently, Koch et al. showed that the survival rate of  $\Delta glfA$  strain  
323 (Schmalhorst's strain) decreased slightly more gradually compared with the wild strains  
324 using zebrafish embryo model (37). They explained that the attenuated pathogenicity of the  
325  $\Delta glfA$  strain might be caused by decreased germination rate or hyphal growth rate (37). These

326 differences in virulence might be due to varying genetic backgrounds of the strains used or  
327 differing protocols of pathogenicity tests, necessitating further detailed analysis to  
328 understand the involvement of  $\beta$ -(1 $\rightarrow$ 5)-galactofuranosyl sugar chains in pathogenicity.

329           This study broadens our understanding of the biosynthesis of  
330  $\beta$ -(1 $\rightarrow$ 5)-galactofuranosyl residues in *A. fumigatus* and their important role in cell wall  
331 formation. However,  $\beta$ -(1 $\rightarrow$ 6)-galactofuranosyltransferases that transfer  $\beta$ -galactofuranose  
332 to galactofuranosyl residues have not been identified in *A. fumigatus*. Additionally,  
333  $\beta$ -(1 $\rightarrow$ 2)-,  $\beta$ -(1 $\rightarrow$ 3)-/ $\beta$ -(1 $\rightarrow$ 6)-galactofuranosyltransferases transferring  $\beta$ -galactofuranose  
334 to mannosyl residues remain unknown. Our findings regarding the biosynthesis of  
335  $\beta$ -(1 $\rightarrow$ 5)-galactofuranosyl residue provide important novel insights into the formation of the  
336 complex cell wall structure and the virulence of the subphylum Pezizomycotina. Future  
337 studies will be needed to identify other galactofuranosyltransferases and clarify the  
338 individual functions of each Gal<sub>7</sub>-containing oligosaccharide.

339

340 **MATERIALS AND METHODS**



341 **Microorganisms and growth conditions.** *A. fumigatus* strains used in this study are listed in  
342 Table S1. *A. fumigatus* A1160 and A1151 were obtained from the Fungal Genetics Stock  
343 Center (FGSC) (38). Strains were grown on minimal medium (MM). Standard  
344 transformation procedures for *Aspergillus* strains were used. Plasmids were amplified in *E.*  
345 *coli* DH5 $\alpha$ . *E. coli* strain Rosetta-gami B (DE3) purchased from Merck Millipore (Merck  
346 Millipore, Germany) was used for protein expression. Colony growth rates were measured as  
347 described previously (14).

348

349 **Construction of GfsB and GfsC expression vector.** All PCR reactions were performed  
350 using Prime STAR GXL DNA Polymerase (Takara Bio, Otsu, Japan). The pCold<sup>TM</sup> II  
351 (Takara Bio) and pET50b-Amp plasmids for protein expression in *E. coli* were used. The  
352 pET50b-Amp is a plasmid constructed by replacing the kanamycin resistance gene of  
353 pET50b with an ampicillin resistance gene, and was constructed as follows: DNA region of  
354 pET50b except for the kanamycin resistance gene was amplified by PCR using pET50b  
355 plasmid as a template for the primer pairs, pET50b-Amp-F and pET50b-Amp-R. The

356 ampicillin resistance gene was amplified by PCR using pET15b plasmid as a template for the  
357 primer pairs Amp-gene-F and Amp-gene-R. The obtained DNA fragments were ligated  
358 using an In-fusion HD cloning Kit (Takara Bio) to yield pET50b-Amp. Plasmids useful for  
359 expression of *gfsB* and *gfsC* were constructed as follows: total RNA was extracted from *A.*  
360 *fumigatus* A1160 strain mycelia grown in MM for 18 h using TRIzol Reagent (Thermo  
361 Fisher Scientific, MA, USA) according to the manufacturer's instructions. Single-stranded  
362 DNA was synthesized by M-MLV Reverse Transcriptase (NIPPON GENE, Tokyo, Japan)  
363 using oligo-dT-18 primers. *gfsB* and *gfsC* were amplified using PCR with single-stranded  
364 DNA as a template for primer pairs pET50b-AfGfsB-F and pET50b-AfGfsB-R for *gfsB*,  
365 pCold2-AfGfsC-F and pCold2-AfGfsC-R for *gfsC*, respectively. The amplified fragments  
366 were inserted into the *Nde* I site of pCold™ II to yield pCold2-AfGfsC, and the *Sma* I site of  
367 pET50b-Amp to yield pET50b-Amp-AfGfsB using the In-fusion HD cloning Kit. The  
368 constructed plasmids were transformed into Rosetta-gami B (DE3) cells.  
369

370 **Protein purification, quantification, and electrophoresis.** GfsA protein was expressed in  
371 Rosetta-gami B (DE3) cells harboring the plasmids pET15b-AfGfsA (4). Protein expression  
372 and purification for GfsA and GfsB were performed as described previously (4).  
373 Rosetta-gami B (DE3) cells harboring the plasmids pCold2-AfGfsC were used for protein  
374 expression of GfsC, which was performed according to the manufacturer's protocol for the  
375 pCold DNA cold-shock expression system. The NusA tag of GfsB was cleaved with a HRV  
376 3C protease at 4°C (Takara Bio) and removed by Ni-agarose. Protein concentrations were  
377 determined using the Qubit Protein Assay Kit (Thermo Fisher Scientific), and purified  
378 proteins were analyzed by SDS-PAGE to assess purity and molecular weight. Glf protein  
379 was obtained with the ASKA clone as previously described (4, 39). Purified Glf was  
380 visualized as a band close to the predicted molecular weights of 45.0 kDa (Fig. S1).

381

382 **Synthesis of *p*-nitrophenyl  $\beta$ -D-galactofuranoside (pNP-Gal<sub>f</sub>) and 4-methylumbelliferyl**  
383  **$\beta$ -D-galactofuranoside (4MU-Gal<sub>f</sub>).** Para-nitrophenyl  $\beta$ -D-galactofuranoside (pNP-Gal<sub>f</sub>)  
384 was chemically synthesized as described previously (18, 40) or purchased (Toronto Research

385 Chemicals, Toronto, Canada). 4-methylumbelliferyl  $\beta$ -D-galactofuranoside (4MU-Gal<sub>f</sub>) was  
386 chemically synthesized as follows (41, 42): 4-methylumbelliferon (50.0 mmol) and  
387 BF<sub>3</sub>•Et<sub>2</sub>O (50.0 mmol) was added to a solution of per-benzoylated galactofuranose (10.0  
388 mmol) with 4A molecular sieves in CH<sub>3</sub>CN (50 mL) at 0°C (41). The reaction mixture was  
389 stirred at 0°C for 1 h followed by 23°C for 24 h. Next, the mixture was filtered through a  
390 Celite pad and the residue was diluted with EtOAc, washed with sat. aq. NaHCO<sub>3</sub> solution  
391 and brine, dried over MgSO<sub>4</sub>, and concentrated *in vacuo* to dryness, producing a mixture of  
392 4-methylumbelliferyl 2,3,4,6-tetra-*O*-benzoyl- $\beta$ -D-galactofuranoside. A 28% aq. NH<sub>3</sub>  
393 solution was added to the aforementioned mixture in CH<sub>3</sub>OH at 0°C, the resulting solution  
394 was stirred at this temperature for 1 h and then at 23°C for 24 h. The reaction solution was  
395 concentrated. The target material was purified by silica-gel column chromatography  
396 (CHCl<sub>3</sub>:CH<sub>3</sub>OH, 4/1) to give 4-methylumbelliferyl  $\beta$ -D-galactofuranoside (4MU-Gal<sub>f</sub>) as a  
397 yellow solid (1.80 mmol).

398

399 **Continuous enzymatic reaction assay.** Standard assays were performed with 1.5 mM

400 4MU- $\beta$ -D-Gal<sub>f</sub> acceptor substrate, 40 mM UDP-galactopyranose, purified Glf protein  
401 (UDP-galactopyranose mutase from *Escherichia coli*: 15.8  $\mu$ g), 40 mM sodium dithionite  
402 (SD), and purified GfsA (4.5  $\mu$ g), GfsB (4.5  $\mu$ g), or GfsC (4.5  $\mu$ g) proteins in a total reaction  
403 volume of 20  $\mu$ L. The mixtures were incubated at 30°C for 16 h and the reaction was stopped  
404 by heat (99°C) for 5 min. The supernatants were analyzed by HPLC with an amino column  
405 Shodex Asahipak NH2P-50 4E (250 x 4.6 mm, Showa Denko, Tokyo, Japan) as previously  
406 described (4). 4-Methylumbelliferyl and *p*-nitrophenyl derivatives were detected by 300 nm  
407 of absorbance. The mass spectra of the enzymatic products of GfsA, GfsB, and GfsC were  
408 determined using the Exactive Plus Orbitrap Mass Spectrometer (Thermo Fisher Scientific).

409

410 **Construction of  $\Delta$ *gfsB* and  $\Delta$ *gfsC* gene disruption strains.** *A. fumigatus* A1151/A1160  
411 was used as parental strain (Table S1); *gfsB* were disrupted in the A1151 strain by *ptrA*  
412 insertion; *gfsC* was also disrupted in the A1160 strain by *AnpyrG* insertion. DNA fragments  
413 for gene disruption were constructed using a “double-joint” PCR method as described  
414 previously (43). The 5'- and 3'-flanking regions (approximately 1.0–1.1 kb each) of each

415 gene were PCR amplified from genomic DNA with the following primer pairs (Table S2):  
416 AFUB\_070620-1/AFUB\_070620-2 and AFUB\_070620-3/AFUB\_070620-4 for *gfsB*  
417 disruption; AFUB\_067290-1/AFUB\_067290-2 and AFUB\_067290-3/AFUB\_067290-4 for  
418 *gfsC*. *ptrA* and *AnpyrG* used as selective markers were amplified using plasmids pPTR-I  
419 (Takara Bio) and pSH1 (14) as template, respectively, and the primer pairs ptrA-5/ptrA-6 or  
420 pyrG-5/pyrG-6. The three amplified fragments were purified and mixed and a second PCR  
421 was performed without specific primers to assemble each fragment, as the overhanging  
422 chimeric extensions act as primers. A third PCR was performed with the nested primer pairs  
423 AFUB\_070620-7/AFUB\_070620-8 for *gfsB* or AFUB\_067290-7/AFUB\_067290-8 for *gfsC*  
424 and the products of the second PCR as a template to generate the final deletion construct. The  
425 amplified final deletion constructs were purified using the Fast Gene Gel/PCR Extraction Kit  
426 (NIPPON GENE) and used directly for transformation. Transformants were grown on MM  
427 plates containing 0.6 M KCl as an osmotic stabilizer under appropriate selection conditions  
428 and single colonies were isolated twice before further analysis. Disruption of target genes  
429 was confirmed by PCR with these primer pairs: AFUB\_070620-1/ptrA-R and

430 ptrA-F/AFUB\_070620-4 for *gfsB*, AFUB\_067290-1/ptrA-R and ptrA-F/AFUB\_067290-4 or  
431 AFUB\_067290-1/pyrG-R and pyrG-F/AFUB\_067290-4 for *gfsC* (Fig. S3).

432

433 **Construction of the complementary strain of  $\Delta gfsC$  using *gfsC*.** *A. fumigatus*  $\Delta gfsC$  strain

434 was used as the parental strain (Table S1). The relevant region of *gfsC* was PCR amplified

435 from genomic DNA using the primer pair AfgfsC-complement-1/AfgfsC-complement-2

436 (Table S2). The relevant region of the *AnpyrG* was PCR amplified from pSH1 using the

437 primer pair AfgfsC-complement-3/AfgfsC-complement-4 (Table S2). *ptrA* used as selective

438 markers were amplified using the pPTR-I plasmid as a template and the primer pair

439 ptrA-5/ptrA-6. The three amplified fragments were purified and mixed, and a second PCR

440 was performed. A third PCR was performed using the nested primer pair

441 AfgfsA-complement-7/AfgfsA-complement-8 and the products of the second PCR as a

442 template to generate the final DNA construct. Correct replacement of the DNA fragments for

443 gene complementation was confirmed by PCR using the primer pairs

444 AfgfsA-complement-1/ptrA-R and ptrA-F/AfgfsA-complement-4 (Fig. S4).

445

446 **Construction of double and triple gene disruption strains.** *A. fumigatus*  $\Delta gfsA$  was used

447 as a parental strain (Table S1) to construct double and triple gene disruption strains. Genes

448 were disrupted in *A. fumigatus* by *ptrA/hph* insertion; *gfsC* was disrupted in strain  $\Delta gfsA$  by

449 *ptrA* insertion to construct strain  $\Delta gfsAC$ . Next, *gfsB* was disrupted in strain  $\Delta gfsAC$  by *hph*

450 insertion to construct strain  $\Delta gfsABC$ . Primer pairs

451 AFUB\_067290-1/AFUB\_067290-2(*gfsC::ptrA*),

452 AFUB\_067290-3(*gfsC::ptrA*)/AFUB\_067290-4, ptrA-5/ptrA-6 and

453 AFUB\_067290-7/AFUB\_067290-8 were used to construct a deletion cassette for  $\Delta gfsC$ .

454 Primer pairs AFUB\_070620-1/AFUB\_070620-2(*gfsB::hph*),

455 AFUB\_070620-3(*gfsB::hph*)/AFUB\_070620-4, hph-5/hph-6 and

456 AFUB\_070620-7/AFUB\_070620-8 were used to construct a deletion cassette for  $\Delta gfsB$ . *hph*

457 was amplified by PCR using pAN7-1 as template (44) and the primers hph-5 and hph-6

458 (Table S2). Target gene disruption was confirmed using PCR with primer pairs

459 AFUB\_096220-1/pyrG-R and pyrG-F/AFUB\_096220-4 for *gfsA*, AFUB\_070620-1/hph-R



460 and hph-F/AFUB\_070620-4 for *gfsB*, and AFUB\_067290-1/ptrA-R and  
461 ptrA-F/AFUB\_067290-4 for *gfsC* (Fig. S5).

462

463 **Methylation analysis and Nuclear magnetic resonance (NMR) spectroscopy.** GMs were  
464 prepared using a previously described method (4, 14). Glycosidic linkage was analyzed using  
465 a previously described method (4, 6). NMR experiments were performed as previously  
466 described (4, 6, 14). Proton and carbon chemical shifts were referenced relative to internal  
467 acetone at  $\delta$  2.225 and 31.07 ppm, respectively.

468

469 **Analysis of conidiation efficiency and surface adhesion.** Conidiation efficiency was  
470 analyzed as described previously (14). Hyphal surface adhesion assay was performed as  
471 described previously with slight modifications (24, 45). The 0.5- $\mu$ m diameter polystyrene  
472 beads (Sigma) were diluted 1:100 in sterile phosphate buffered saline (PBS). Mycelia were  
473 grown for 18 h at 37°C with shaking at 127 rpm in MM liquid medium, harvested into  
474 PBS-containing polystyrene beads for 1 h, and then washed five times with PBS. Mycelia

475 images were collected using a microscope equipped with a digital camera.

476

477 **Drug susceptibility testing and mouse model of pulmonary aspergillosis.** Drug

478 susceptibility was tested in triplicates as described previously (12, 46, 47). The mouse model

479 of pulmonary aspergillosis was generated as per a previously described method with slight

480 modifications (48). In each experiment, A1151,  $\Delta gfsC$ , and  $\Delta gfsC::C$  or A1151,  $\Delta gfsC$ ,

481  $\Delta gfsAC$ , and  $\Delta gfsABC$  strains were used to infect immunosuppressed mice (10 or 11 mice per

482 group). Outbred male ICR mice were housed in sterile cages (5 or 6 per cage) with sterile

483 bedding and provided with sterile feed and drinking water containing 300  $\mu\text{g/ml}$  tetracycline

484 hydrochloride to prevent bacterial infection. Mice were immunosuppressed with

485 cyclophosphamide (200 mg per kg of body weight), which was intraperitoneally

486 administered on days -4, -2, 2, and 5, or -4, -2, and 3 (day 0: infection). Cortisone acetate

487 (200 mg per kg of body weight) was injected on day -1 for immunosuppression. Mice were

488 infected by intratracheal instillation of  $3 \times 10^5$  conidia in 30  $\mu\text{l}$  of PBS. Mice were weighed

489 and visually inspected every 24 h from the day of infection. On recording 30% body weight

490 reduction, the mouse was regarded as dead and euthanized. Prism statistical analysis package  
491 was used for statistical analysis and survival curve drawing (GraphPad Software Inc., CA,  
492 USA).

493

494 **Ethics statement.** The institutional animal care and use committee of Chiba University  
495 approved the animal experiments (Permit Number: DOU28-376 and DOU29-215). All  
496 efforts were made to minimize suffering in strict accordance with the principles outlined by  
497 the Guideline for Proper Conduct of Animal Experiments.

498

#### 499 **ACKNOWLEDGMENTS**

500 This work was supported in part by JSPS KAKENHI grant numbers JP26450106, 18K05418  
501 (to TO) and 17K15492 (to YT), a 2017 Research Grant from the Noda Institute for Scientific  
502 Research (to TO) and Joint Usage/Research Program of Medical Mycology Research Center,  
503 Chiba University (grant numbers 18-9 and 19-4) (to TO). Strains and plasmids were obtained  
504 from the Fungal Genetics Stock Center (Kansas City, MO).

505

506 **REFERENCES**

- 507 1. Latgé JP, Beauvais A, Chamilos G. 2017. The cell wall of the human fungal pathogen  
508 *Aspergillus fumigatus*: biosynthesis, organization, immune response, and virulence.  
509 *Annu Rev Microbiol* 71:99-116. <https://doi.org/10.1146/annurev-micro-030117-020406>.
- 510 2. Gow NAR, Latge JP, Munro CA. 2017. The Fungal cell wall: structure, biosynthesis, and  
511 function. *Microbiol Spectr* 5 <https://doi.org/10.1128/microbiolspec.FUNK-0035-2016>.
- 512 3. Oka T. 2018. Biosynthesis of galactomannans found in filamentous fungi belonging to  
513 Pezizomycotina. *Biosci Biotechnol Biochem* 82:183-191.  
514 <https://doi.org/10.1080/09168451.2017.1422383>.
- 515 4. Katafuchi Y, Li Q, Tanaka Y, Shinozuka S, Kawamitsu Y, Izumi M, Ekino K, Mizuki K,  
516 Takegawa K, Shibata N, Goto M, Nomura Y, Ohta K, Oka T. 2017. GfsA is a  
517  $\beta$ 1,5-galactofuranosyltransferase involved in the biosynthesis of the galactofuran side  
518 chain of fungal-type galactomannan in *Aspergillus fumigatus*. *Glycobiology* 27:568-581.  
519 <https://doi.org/10.1093/glycob/cwx028>.
- 520 5. Latgé JP, Kobayashi H, Debeauvais JP, Diaquin M, Sarfati J, Wieruszeski JM, Parra E,  
521 Bouchara JP, Fournet B. 1994. Chemical and immunological characterization of the  
522 extracellular galactomannan of *Aspergillus fumigatus*. *Infect Immun* 62:5424-5433.
- 523 6. Kudoh A, Okawa Y, Shibata N. 2015. Significant structural change in both O- and  
524 N-linked carbohydrate moieties of the antigenic galactomannan from *Aspergillus*  
525 *fumigatus* grown under different culture conditions. *Glycobiology* 25:74-87.  
526 <https://doi.org/10.1093/glycob/cwu091>.
- 527 7. Costachel C, Coddeville B, Latgé JP, Fontaine T. 2005.  
528 Glycosylphosphatidylinositol-anchored fungal polysaccharide in *Aspergillus fumigatus*.  
529 *J Biol Chem* 280:39835-39842. <https://doi.org/10.1074/jbc.m510163200>.
- 530 8. Muszkieta L, Fontaine T, Beau R, Mouyna I, Vogt MS, Trow J, Cormack BP, Essen LO,  
531 Jouvion G, Latgé JP. 2019. The Glycosylphosphatidylinositol-anchored *DFG* family is  
532 essential for the insertion of galactomannan into the  $\beta$ -(1,3)-glucan-chitin core of the cell  
533 wall of *Aspergillus fumigatus*. *mSphere* 4 pii: e00397-19.  
534 <https://doi.org/10.1128/mSphere.00397-19>.

- 535 9. Oka T, Hamaguchi T, Sameshima Y, Goto M, Furukawa K. 2004. Molecular  
536 characterization of protein *O*-mannosyltransferase and its involvement in cell-wall  
537 synthesis in *Aspergillus nidulans*. *Microbiology* 150:1973-1982.  
538 <https://doi.org/10.1099/mic.0.27005-0>.
- 539 10. Tefsen B, Ram AF, van Die I, Routier FH. 2012. Galactofuranose in eukaryotes: aspects  
540 of biosynthesis and functional impact. *Glycobiology* 22:456-469.  
541 <https://doi.org/10.1093/glycob/cwr144>.
- 542 11. Oka T, Goto M 2016. Biosynthesis of galactofuranose-containing glycans in  
543 filamentous fungi. *Trends Glycosci Glycotechnol* 28:E39–E45.  
544 <https://doi.org/10.4052/tigg.1428.1E>.
- 545 12. Onoue T, Tanaka Y, Hagiwara D, Ekino K, Watanabe A, Ohta K, Kamei K, Shibata N,  
546 Goto M, Oka T. 2018. Identification of two mannosyltransferases contributing to  
547 biosynthesis of the fungal-type galactomannan  $\alpha$ -core-mannan structure in *Aspergillus*  
548 *fumigatus*. *Sci Rep* 8:16918. <https://doi.org/10.1038/s41598-018-35059-2>.
- 549 13. Henry C, Li J, Danion F, Alcazar-Fuoli L, Mellado E, Beau R, Jouvion G, Latgé JP,  
550 Fontaine T. 2019. Two KTR mannosyltransferases are responsible for the biosynthesis of  
551 cell wall mannans and control polarized growth in *Aspergillus fumigatus*. *mBio* 10:  
552 e02647-18. <https://doi.org/10.1128/mBio.02647-18>.
- 553 14. Komachi Y, Hatakeyama S, Motomatsu H, Futagami T, Kizjakina K, Sobrado P, Ekino K,  
554 Takegawa K, Goto M, Nomura Y, Oka T. 2013. GfsA encodes a novel  
555 galactofuranosyltransferase involved in biosynthesis of galactofuranose antigen of  
556 *O*-glycan in *Aspergillus nidulans* and *Aspergillus fumigatus*. *Mol Microbiol*  
557 90:1054-1073. <https://doi.org/10.1111/mmi.12416>.
- 558 15. Nassau PM, Martin SL, Brown RE, Weston A, Monsey D, McNeil MR, Duncan K. 1996.  
559 Galactofuranose biosynthesis in *Escherichia coli* K-12: identification and cloning of  
560 UDP-galactopyranose mutase. *J Bacteriol* 178:1047-1052.  
561 <https://doi.org/10.1128/jb.178.4.1047-1052.1996>.
- 562 16. Lee R, Monsey D, Weston A, Duncan K, Rithner C, McNeil M. 1996. Enzymatic  
563 synthesis of UDP-galactofuranose and an assay for UDP-galactopyranose mutase based  
564 on high-performance liquid chromatography. *Anal Biochem* 242:1-7.

- 565 <https://doi.org/10.1006/abio.1996.0419>.
- 566 17. Varela O, Marino C, de Lederkremer RM. 1986. Synthesis of *p*-nitrophenyl beta-  
567 D-galactofuranoside. A convenient substrate for beta-galactofuranosidase. *Carbohydr*  
568 *Res* 155:247–251. [https://doi.org/10.1016/S0008-6215\(00\)90153-8](https://doi.org/10.1016/S0008-6215(00)90153-8).
- 569 18. Ota R, Okamoto Y, Vavricka CJ, Oka T, Matsunaga E, Takegawa K, Kiyota H, Izumi M.  
570 2019. Chemo-enzymatic synthesis of *p*-nitrophenyl β-D-galactofuranosyl disaccharides  
571 from *Aspergillus* sp. fungal-type galactomannan. *Carbohydr Res* 473:99-103.  
572 <https://doi.org/10.1016/j.carres.2019.01.005>.
- 573 19. Wasmuth CR, Edwards C, Hutcherson R. 1964. Participation of the SO<sub>2</sub><sup>-</sup> Radical Ion in  
574 the Reduction of *p*-Nitrophenol by Sodium Dithionite. *J Phys Chem* 68: 423-425.  
575 <https://doi.org/10.1021/j100784a510>.
- 576 20. Shibata N, Saitoh T, Tadokoro Y, Okawa Y. 2009. The cell wall galactomannan antigen  
577 from *Malassezia furfur* and *Malassezia pachydermatis* contains beta-1,6-linked linear  
578 galactofuranosyl residues and its detection has diagnostic potential. *Microbiology*  
579 155:3420-3429. <https://doi.org/10.1099/mic.0.029967-0>.
- 580 21. Rose NL, Zheng RB, Pearcey J, Zhou R, Completo GC, Lowary TL. 2008. Development  
581 of a coupled spectrophotometric assay for GlfT2, a bifunctional mycobacterial  
582 galactofuranosyltransferase. *Carbohydr Res* 343:2130-2139.  
583 <https://doi.org/10.1016/j.carres.2008.03.023>.
- 584 22. May JF, Splain RA, Brotschi C, Kiessling LL. A tethering mechanism for length control  
585 in a processive carbohydrate polymerization. 2009 *Proc Natl Acad Sci U S A*  
586 106:11851-11856. <https://doi.org/10.1073/pnas.0901407106>.
- 587 23. Shibata N, Okawa Y. 2011. Chemical structure of beta-galactofuranose containing  
588 polysaccharide and *O*-linked oligosaccharides obtained from the cell wall of pathogenic  
589 dematiaceous fungus *Fonsecaea pedrosoi*. *Glycobiology* 21:69–81.  
590 <https://doi.org/10.1093/glycob/cwq132>.
- 591 24. Lamarre C, Beau R, Balloy V, Fontaine T, Wong Sak Hoi J, Guadagnini S, Berkova N,  
592 Chignard M, Beauvais A, Latgé JP. 2009 Galactofuranose attenuates cellular adhesion of  
593 *Aspergillus fumigatus*. *Cell Microbiol* 11:1612-1623.  
594 <https://doi.org/10.1111/j.1462-5822.2009.01352.x>.

- 595 25. Errey JC, Mukhopadhyay B, Kartha KP, Field RA. 2004. Flexible enzymatic and  
596 chemo-enzymatic approaches to a broad range of uridine-diphospho-sugars. *Chem*  
597 *Commun (Camb)* 7:2706-2707. <https://doi.org/10.1039/b410184g>.
- 598 26. Tsvetkova YE, Nikolaev AV. 2000. The first chemical synthesis of  
599 UDP- $\alpha$ -D-galactofuranose. *J Chem Soc Perkin Trans* 1:889-891.  
600 <https://doi.org/10.1039/B000210K>.
- 601 27. Rose NL, Completo GC, Lin SJ, McNeil M, Palcic MM, Lowary TL. 2006. Expression,  
602 purification, and characterization of a galactofuranosyltransferase involved in  
603 *Mycobacterium tuberculosis* arabinogalactan biosynthesis. *J Am Chem Soc*  
604 128:6721-6729. <https://doi.org/10.1021/ja058254d>.
- 605 28. Arentshorst M, de Lange D, Park J, Legendijk EL, Alazi E, van den Hondel CAMJJ, Ram  
606 AFJ. 2019. Functional analysis of three putative galactofuranosyltransferases with  
607 redundant functions in galactofuranosylation in *Aspergillus niger*. *Arch Microbiol*  
608 <https://doi.org/10.1007/s00203-019-01709-w>.
- 609 29. Schmalhorst PS, Krappmann S, Vervecken W, Rohde M, Müller M, Braus GH, Contreras  
610 R, Braun A, Bakker H, Routier FH. 2008. Contribution of galactofuranose to the  
611 virulence of the opportunistic pathogen *Aspergillus fumigatus*. *Eukaryot Cell* 2008  
612 7:1268-1277. <https://doi.org/10.1128/EC.00109-08>.
- 613 30. Engel J, Schmalhorst PS, Dörk-Bousset T, Ferrières V, Routier FH. 2009. A single  
614 UDP-galactofuranose transporter is required for galactofuranosylation in *Aspergillus*  
615 *fumigatus*. *J Biol Chem* 284:33859-33868. <https://doi.org/10.1074/jbc.M109.070219>.
- 616 31. Toledo MS, Levery SB, Bennion B, Guimaraes LL, Castle SA, Lindsey R, Momany M,  
617 Park C, Straus AH, Takahashi HK. 2007. Analysis of glycosylinositol  
618 phosphorylceramides expressed by the opportunistic mycopathogen *Aspergillus*  
619 *fumigatus*. *J Lipid Res* 48:1801-1824. <https://doi.org/10.1194/jlr.m700149-jlr200>.
- 620 32. Guimarães LL, Toledo MS, Ferreira FA, Straus AH, Takahashi HK. 2014. Structural  
621 diversity and biological significance of glycosphingolipids in pathogenic and  
622 opportunistic fungi. *Front Cell Infect Microbiol* 4:138.  
623 <https://doi.org/10.3389/fcimb.2014.00138>.
- 624 33. Kotz A, Wagener J, Engel J, Routier F, Echtenacher B, Pich A, Rohde M, Hoffmann P,

- 625 Heesemann J, Ebel F. 2010. The *mitA* gene of *Aspergillus fumigatus* is required for  
626 mannosylation of inositol-phosphorylceramide, but is dispensable for pathogenicity.  
627 Fungal Genet Biol 47:169-178. <https://doi.org/10.1016/j.fgb.2009.10.001>.
- 628 34. Iwahara S, Maeyama T, Mishima T, Jikibara T, Takegawa K, Iwamoto H 1992. Studies  
629 on the uronic acid-containing glycoproteins of *Fusarium* sp. M7-1: IV. Isolation and  
630 identification of four novel oligosaccharide units derived from the acidic polysaccharide  
631 chain. J Biochem 112:355-359. <https://doi.org/10.1093/oxfordjournals.jbchem.a123905>.
- 632 35. Iwahara S, Mishima T, Ramli N, Takegawa K. 1996. Degradation of beta 1-->6  
633 galactofuranoside linkages in the polysaccharide of *Fusarium* sp. M7-1 by  
634 endo-beta-galactofuranosidase from *Bacillus* sp. Biosci Biotechnol Biochem  
635 60:957-961. <https://doi.org/10.1271/bbb.60.957>.
- 636 36. Chen YL, Mao WJ, Tao HW, Zhu WM, Yan MX, Liu X, Guo TT, Guo T. 2015.  
637 Preparation and characterization of a novel extracellular polysaccharide with antioxidant  
638 activity, from the mangrove-associated fungus *Fusarium oxysporum*. Mar Biotechnol  
639 (NY) 17:219-228. <https://doi.org/10.1007/s10126-015-9611-6>.
- 640 37. Koch BEV, Hajdamowicz NH, Lagendijk E, Ram AFJ, Meijer AH. 2019. *Aspergillus*  
641 *fumigatus* establishes infection in zebrafish by germination of phagocytized conidia,  
642 while *Aspergillus niger* relies on extracellular germination. Sci Rep. 9:12791.  
643 <https://doi.org/10.1038/s41598-019-49284-w>.
- 644 38. da Silva Ferreira ME, Kress MR, Savoldi M, Goldman MH, Härtl A, Heinekamp T,  
645 Brakhage AA, Goldman GH. 2006. The *akuB*(KU80) mutant deficient for  
646 nonhomologous end joining is a powerful tool for analyzing pathogenicity in *Aspergillus*  
647 *fumigatus*. Eukaryot Cell 5:207-211. <https://doi.org/10.1128/ec.5.1.207-211.2006>.
- 648 39. Kitagawa M, Ara T, Arifuzzaman M, Ioka-Nakamichi T, Inamoto E, Toyonaga H, Mori  
649 H. 2005. Complete set of ORF clones of *Escherichia coli* ASKA library (a complete set  
650 of *E. coli* K-12 ORF archive): unique resources for biological research. DNA Res  
651 12:291-299. <https://doi.org/10.1093/dnares/dsi012>.
- 652 40. Matsunaga E, Higuchi Y, Mori K, Yairo N, Oka T, Shinozuka S, Tashiro K, Izumi M,  
653 Kuhara S, Takegawa K. 2015. Identification and characterization of a novel



- 654 galactofuranose-specific  $\beta$ -D-galactofuranosidase from *Streptomyces* species. PLoS One  
655 10:e0137230. <http://10.1371/journal.pone.0137230>
- 656 41. D'Accorso NB, Thiel IME, Schüller M. 1983. Proton and C-13 nuclear magnetic  
657 resonance spectra of some benzoylated aldohexoses. Carbohydr. Res 124:177-184.  
658 [https://doi.org/10.1016/0008-6215\(83\)88453-5](https://doi.org/10.1016/0008-6215(83)88453-5).
- 659 42. de Lederkremer RM, Nahmad VB, Varela O. 1994. Synthesis of  $\alpha$ -D-Galactofuranosyl  
660 Phosphate. J Org Chem 59, 690-692. <http://dx.doi.org/10.1021/jo00082a037>
- 661 43. Yu JH, Hamari Z, Han KH, Seo JA, Reyes-Domínguez Y, Scazzocchio C. 2004.  
662 Double-joint PCR: a PCR-based molecular tool for gene manipulations in filamentous  
663 fungi. *Fungal Genet Biol.* 41:973-981. <https://doi.org/10.1016/j.fgb.2004.08.001>.
- 664 44. Punt PJ, Oliver RP, Dingemans MA, Pouwels PH, van den Hondel CA. 1987.  
665 Transformation of *Aspergillus* based on the hygromycin B resistance marker from  
666 *Escherichia coli*. Gene 56:117-124. [https://doi.org/10.1016/0378-1119\(87\)90164-8](https://doi.org/10.1016/0378-1119(87)90164-8).
- 667 45. Alam MK, van Straaten KE, Sanders DA, Kaminskyj SG. 2014. *Aspergillus nidulans* cell  
668 wall composition and function change in response to hosting several *Aspergillus*  
669 *fumigatus* UDP-galactopyranose mutase activity mutants. PLoS One 9:e85735.  
670 <https://doi.org/10.1371/journal.pone.0085735>.
- 671 46. Wayne, P. A. 2008. Clinical and laboratory standards institute reference method for broth  
672 dilution antifungal susceptibility testing of filamentous fungi. CLSI. Approved  
673 standard-second edition clinical and laboratory standards institute document M38-A2.
- 674 47. Kikuchi K, Watanabe A, Ito J, Oku Y, Wuren T, Taguchi H, Yarita K, Muraosa Y, Yahiro  
675 M, Yaguchi T, Kamei K. 2014. Antifungal susceptibility of *Aspergillus fumigatus* clinical  
676 isolates collected from various areas in Japan. J Infect Chemother 20:336-338.  
677 <https://doi.org/10.1016/j.jiac.2014.01.003>.
- 678 48. Hagiwara D, Miura D, Shimizu K, Paul S, Ohba A, Gono T, Watanabe A, Kamei K,  
679 Shintani T, Moye-Rowley WS, Kawamoto S, Gomi K. 2017. A Novel Zn<sub>2</sub>-Cys<sub>6</sub>  
680 Transcription Factor AtrR Plays a key role in an azole resistance mechanism of

681 *Aspergillus fumigatus* by co-regulating *cyp51A* and *cdr1B* expressions. PLoS Pathog  
682 13:e1006096. <https://doi.org/10.1371/journal.ppat.1006096>.

683

684

685

686

687

688

689

690

691

692

693

694

695

696

697 **FIGURE LEGENDS**

698 **Figure 1. *In vitro* method for measuring galactofuranosyltransferase activity using a**  
699 **continuous reaction.** (A) Schematic diagram of continuous reaction in  
700 galactofuranosyltransferase activity assay. Glf is UDP-galctopyranose (Gal<sub>p</sub>) mutase derived  
701 from *E. coli* to generate UDP-Gal<sub>f</sub> from UDP-Gal<sub>p</sub>. The enzymatic equilibrium of a  
702 reversible Glf enzyme is skewed >93% to UDP-Gal<sub>p</sub>. When a small amount of UDP-Gal<sub>f</sub>  
703 generated is consumed by galactofuranosyltransferase, Glf reverts to UDP-Gal<sub>f</sub> to maintain  
704 equilibrium. Glf oxidizes FADH<sub>2</sub> to FAD when converting from UDP-Gal<sub>p</sub> to UDP-Gal<sub>f</sub>.  
705 Therefore, reducing FAD to FADH<sub>2</sub> is essential for a continuous reaction. The dithionite ion  
706 plays a role as a driving horse for proceeding to galactofuranosylation by reduction of  
707 FADH<sub>2</sub> from FAD within the continuous reaction. (B) Chromatograms of *in vitro* assay of  
708 galactofuranosyltransferase activity of GfsA, GfsB, and GfsC. Enzyme activities were  
709 assayed as described in the Materials and Methods. 4.5 μg of purified GfsA, GfsB, or GfsC  
710 were used as enzyme. Chromatograms indicate typical results of the assay with/without  
711 GfsA, GfsB, or GfsC (*right and left panels, respectively*). The assays lacking GfsA, GfsB, or

712 GfsC showed no novel peak generation (*left panels*), but in contrast, fractions containing  
713 GfsA, GfsB, or GfsC did have new products (defined as AG2-AG7 for GfsA; BG2 and BG3  
714 for GfsB; CG2-CG5 for GfsC; *right panels*). Retention times were 18.0 min for AG2, BG2,  
715 and CG2, 20.4 min for AG3, BG3, and CG3, 23.4 min for AG4 and CG4, 26.5 min for AG5  
716 and CG5, 30.2 for AG6, and 34.3 min for AG7. Gal<sub>f</sub>, galactofuranose; Gal<sub>p</sub>, galactopyranose;  
717 Glf, UDP-galactopyranose mutase from *E. coli*; UDP, uridine diphosphate; FAD, flavin  
718 adenine dinucleotide; 4MU, 4-methylumbelliferyl.

719 **Figure 2. <sup>1</sup>H-NMR analyses of enzymatic products of GfsA, GfsB, and GfsC using**  
720 **4MU-β-D-Gal<sub>f</sub> as an acceptor substrate.** <sup>1</sup>H-NMR charts for 4MU-β-D-Gal<sub>f</sub>, AG3, BG2,  
721 and CG3. The 5.8 ppm signal was detected in the <sup>1</sup>H-NMR chart for 4MU-β-D-Gal<sub>f</sub>. The  
722 chemical shift values of BG2 of the H-1 position of the underlined Gal<sub>f</sub> residue in the  
723 Gal<sub>f</sub>-β-(1→5)-Gal<sub>f</sub>-β-4MU and Gal<sub>f</sub>-β-(1→5)-Gal<sub>f</sub>-β-4MU structures are 5.22 and 5.79 ppm,  
724 respectively, according to previous reports (4, 6, 17, 18). The chemical shift values of AG3  
725 and CG3 of the H-1 position of the underlined Gal<sub>f</sub> residue in the  
726 Gal<sub>f</sub>-β-(1→5)-Gal<sub>f</sub>-β-(1→5)-Gal<sub>f</sub>-β-4MU, Gal<sub>f</sub>-β-(1→5)-Gal<sub>f</sub>-β-(1→5)-Gal<sub>f</sub>-β-4MU and

727 Gal<sub>f</sub>-β-(1→5)-Gal<sub>f</sub>-β-(1→5)-Gal<sub>f</sub>-β-4MU structures are 5.22, 5.20 and 5.79 ppm,  
728 respectively, according to previous reports (4, 6, 17, 18).

729

730 **Figure 3. Methylation analyses of enzymatic products of GfsA, GfsB, and GfsC using**

731 **4MU-β-D-Gal<sub>f</sub> as an acceptor substrate.** 500-μg samples of AG3, AG4, BG2, CG3, and

732 CG4 were analyzed. The retention times under these analysis conditions for t-Gal<sub>f</sub>→,

733 5-Gal<sub>f</sub>1→ and 6-Gal<sub>f</sub>1→ were 16.36, 18.40, and 19.56 min, respectively (4, 6, 20). The

734 asterisk indicates an artificial peak that appears frequently.

735

736 **Figure 4. <sup>13</sup>C-NMR analyses of purified FTGM+OMGM fractions from A1151, ΔgfsB,**

737 **ΔgfsC, ΔgfsAB, ΔgfsABC, and ΔgfsC::C strains.** The signals at 107.87 ppm and 108.70

738 ppm represent a C-1 chemical shift of the underlined Gal<sub>f</sub> residue in the

739 Gal<sub>f</sub>-β-(1→5)-Gal<sub>f</sub>-β-(1→5)-Gal<sub>f</sub> (β-(1→5)-Gal<sub>f</sub>) and Gal<sub>f</sub>-β-(1→5)-Gal<sub>f</sub>-β-(1→6)-Gal<sub>f</sub>

740 (β-(1→6)-Gal<sub>f</sub>) structures, respectively (6, 20). The carbon chemical shifts were referenced

741 relative to internal acetone at 31.07 ppm, respectively. OMGM, O-mannose-type

742 galactomannan; FTGM, fungal-type galactomannan; FTGM+OMGM, total GM (FTGM +  
743 OMGM).

744

745 **Figure 5. Analysis of galactofuran side chain length of fungal-type galactomannan.**

746 Galactofuran side chain was prepared and separated by gel filtration chromatography.

747 FTGM+OMGM fractions were treated with 0.15 M of trifluoroacetic acid at 100°C for 15

748 min. The resultant samples were applied to gel filtration chromatography using a Bio-Gel P-2

749 (2 × 90 cm) column and dH<sub>2</sub>O as eluent. The partial acid hydrolysis product of dextran was

750 used as a molecular weight marker. The eluted sugar was detected using the phenol-sulfuric

751 acid method. G1, Glucose; G2, Maltose; G3, Maltotriose; G4, Maltotetraose; G5,

752 Maltopentaose; G6, Maltohexaose; G7, Maltoheptaose.

753

754 **Figure 6. Colony phenotype comparison of A1151,  $\Delta gfsA$ ,  $\Delta gfsB$ ,  $\Delta gfsC$ ,  $\Delta gfsAB$ ,**

755  **$\Delta gfsABC$ ,  $gfsA::A$  and  $\Delta gfsC::C$  strains.** Strain colony images are shown for A1151,

756  $\Delta gfsA$ ,  $\Delta gfsB$ ,  $\Delta gfsC$ ,  $\Delta gfsAB$ ,  $\Delta gfsABC$ ,  $gfsA::A$ , and  $\Delta gfsC::C$ . Conidia were incubated on

757 minimal medium at 37°C (*left*) or 50°C (*right*) for 3 days.

758

759 **Figure 7. Morphology of the A1151,  $\Delta glfA$ ,  $\Delta gfsAC$ , and  $\Delta gfsABC$  strains.** (A) Hyphae

760 morphology of the A1151,  $\Delta glfA$ ,  $\Delta gfsAC$ , and  $\Delta gfsABC$  strains. (B) Hyphae hydrophobicity

761 of A1151,  $\Delta glfA$ ,  $\Delta gfsAC$ , and  $\Delta gfsABC$  strains. Hydrophobicity is indicated by adherence of

762 latex beads to the hyphae.

763

764 **Figure 8.  $\beta$ -(1 $\rightarrow$ 5)-galactofuranosyl residues are dispensable for virulence in a mouse**

765 **model of invasive pulmonary aspergillosis.** (A) Infection with A1151,  $\Delta gfsC$  and  $\Delta gfsC::C$

766 strains. Outbred ICR mice (male; 5 weeks of age; n=11) were immune-compromised via

767 intraperitoneal injection of cyclophosphamide (200 mg/kg) at days -4, -2, 2, and 5.

768 Cortisone acetate was also administrated subcutaneously at a concentration of 200 mg per kg

769 of body weight on day -1. Mice were infected intratracheally with  $3.0 \times 10^5$  conidia in a

770 volume of 30  $\mu$ L for each strain (A1151,  $\Delta gfsC$  and  $\Delta gfsC::C$  strains) on day 0. (B) Mouse

771 infection with A1151,  $\Delta gfsC$ ,  $\Delta gfsAC$ , and  $\Delta gfsABC$  strains. Outbred ICR mice (male; 5

772 weeks of age; n=10–11) were immune-compromised via intraperitoneal injection of  
773 cyclophosphamide (200 mg/kg mouse) at days –4, –2, 2, and 3. Cortisone acetate was also  
774 administered subcutaneously at a concentration of 200 mg per kg of body weight on day –1.  
775 Mice were infected intratracheally with  $3.0 \times 10^5$  conidia in a volume of 30  $\mu$ L for each strain  
776 (A1151,  $\Delta gfsC$ ,  $\Delta gfsAC$ , and  $\Delta gfsABC$ ) on day 0.

777

778 **Figure 9. Proposed GM structures in  $\Delta gfsAC$  strain.** (A) Typical structure of FTGM, and  
779 (B) OMGM in *A. fumigatus*. (C) Proposed structure of FTGM in the  $\Delta gfsAC$  strain. (D)  
780 Proposed structure of OMGM in the  $\Delta gfsAC$  strain.

781

782

783



784 **Figure S1. SDS-PAGE analysis of purified recombinant GfsA, GfsB, GfsC, and Glf**  
785 **proteins.** Purified recombinant GfsA (5.0  $\mu$ g), GfsB (3.0  $\mu$ g), GfsC (5.0  $\mu$ g), and Glf (5.0  $\mu$ g)  
786 were separated by 5%–20% SDS-PAGE and stained with Coomassie brilliant blue, revealing  
787 bands of approximately 57.9 kDa (GfsA), 50.3 kDa (GfsB), 52.0 kDa (GfsC), and 45.0 kDa  
788 (Glf).

789

790 **Figure S2. Effects of reducing agent and acceptor substrate on**  
791 **galactofuranosyltransferase assay.** Chemically synthesized  
792 4-methylumbelliferyl- $\beta$ -D-galactofuranoside (4MU- $\beta$ -D-Gal<sub>f</sub>) or  
793 *p*-nitrophenyl- $\beta$ -D-galactofuranoside (pNP- $\beta$ -D-Gal<sub>f</sub>) were used acceptor substrate. The  
794 chromatogram of standard galactofuranosyltransferase assay containing the purified GfsA  
795 protein (4.5  $\mu$ g), purified 15.8  $\mu$ g of Glf protein, 40 mM UDP-Gal<sub>p</sub>, 1 mM Mn<sup>2+</sup>, 1.5 mM  
796 4MU- $\beta$ -D-Gal<sub>f</sub>, and 40 mM sodium dithionite (SD) at 30°C for 16 h (a); 40 mM SD was  
797 omitted from the standard assay (b); 40 mM NADH was added to the standard assay instead  
798 of 40 mM SD (c), pNP- $\beta$ -D-Gal<sub>f</sub> was used as an acceptor substrate instead of 4MU- $\beta$ -D-Gal<sub>f</sub>

799 (d), or pNP- $\beta$ -D-Gal<sub>f</sub> instead of 4MU- $\beta$ -D-Gal<sub>f</sub> and 40 mM SD was omitted from the  
800 standard assay (e); and 40 mM NADPH was added to the standard assay instead of 40 mM  
801 SD (f).

802

803 **Figure S3. Construction of the strains  $\Delta gfsB$ ,  $\Delta gfsC$  (*ptrA*), and  $\Delta gfsC$  (*AnpyrG*).**

804 Chromosomal maps of strains  $\Delta gfsB$  (a) and  $\Delta gfsC$  (b), and primers used for confirmation.

805 The positions of the primers are indicated by arrows. Electrophoretic analyses of products

806 amplified by PCR using the primer pairs AFUB\_070620-1/*ptrA*-R (5'-region) and

807 *ptrA*-F/AFUB\_070620-4 (3'-region) for  $\Delta gfsB$  (c), and AFUB\_067290-1/*pyrG*-R (5'-region)

808 and *pyrG*-F/AFUB\_067290-4 (3'-region) for  $\Delta gfsC$  (d). M: DNA size markers; Gene Ladder

809 Wide 2 (Nippon Gene, Tokyo, Japan).

810

811 **Figure S4. Construction of the  $\Delta gfsC$  complementary strains  $\Delta gfsC::C$ .** (a) Schematic

812 representation of  $\Delta gfsC$  complementation with *gfsC*. *gfsC* (P), *gfsC* promoter; *gfsC* (T), *gfsC*

813 terminator; *gfsC*, open reading frame of *gfsC*. The positions of the primers are indicated by

814 arrows. (b) Confirmation of correct recombination of *gfsC* using PCR analysis.  
815 Electrophoretic analysis of products amplified by PCR are shown. M, DNA size markers;  
816 Gene Ladder Wide 2; Lane 1, DNA fragment (2.6 kbp) amplified using PCR and the primers  
817 A*gfsC*-complement-7 and ptrA-R; lane 2, DNA fragment (1.1 kb) amplified using PCR and  
818 the primers ptrA-F and A*gfsC*-complement-8.

819

820 **Figure S5. Construction of the strains  $\Delta gfsAC$  and  $\Delta gfsABC$ .** (a) Chromosomal maps of  
821 strains  $\Delta gfsAC$  (a) and  $\Delta gfsABC$  (b), and primers used for confirmation. The positions of the  
822 primers are indicated by arrows. Electrophoretic analyses of products amplified by PCR  
823 using the primer pairs AFUB\_096220-1/pyrG-R (5' region of *gfsA*),  
824 pyrG-F/AFUB\_096220-4 (3' region of *gfsA*), AFUB\_067290-1/ptrA-R (5' region of *gfsC*),  
825 and ptrA-F/AFUB\_067290-4 (3' region of *gfsC*), for  $\Delta gfsAC$  (c), AFUB\_096220-1/pyrG-R  
826 (5' region of *gfsA*, pyrG-F/AFUB\_096220-4 (3' region of *gfsA*), AFUB\_070620-1/hygB-R  
827 (5' region of *gfsB*), hygB-F/AFUB\_070620-4 (3' region of *gfsB*), AFUB\_067290-1/ptrA-R

828 (5' region of *gfsC*), and ptrA-F/AFUB\_067290-4 (3' region of *gfsC*), for  $\Delta gfsABC$  (d). M:

829 DNA size markers; Gene Ladder Wide 2.

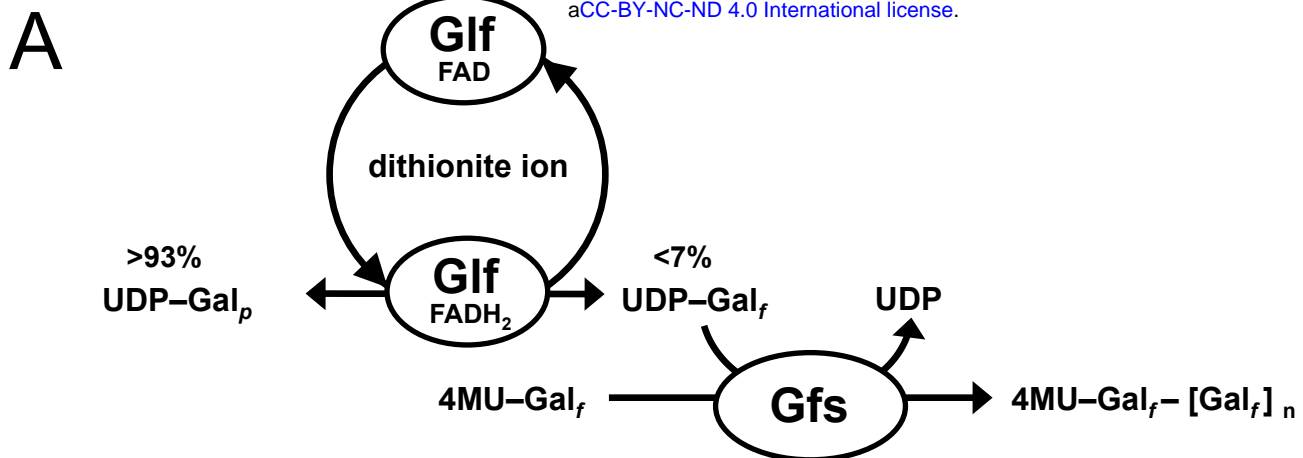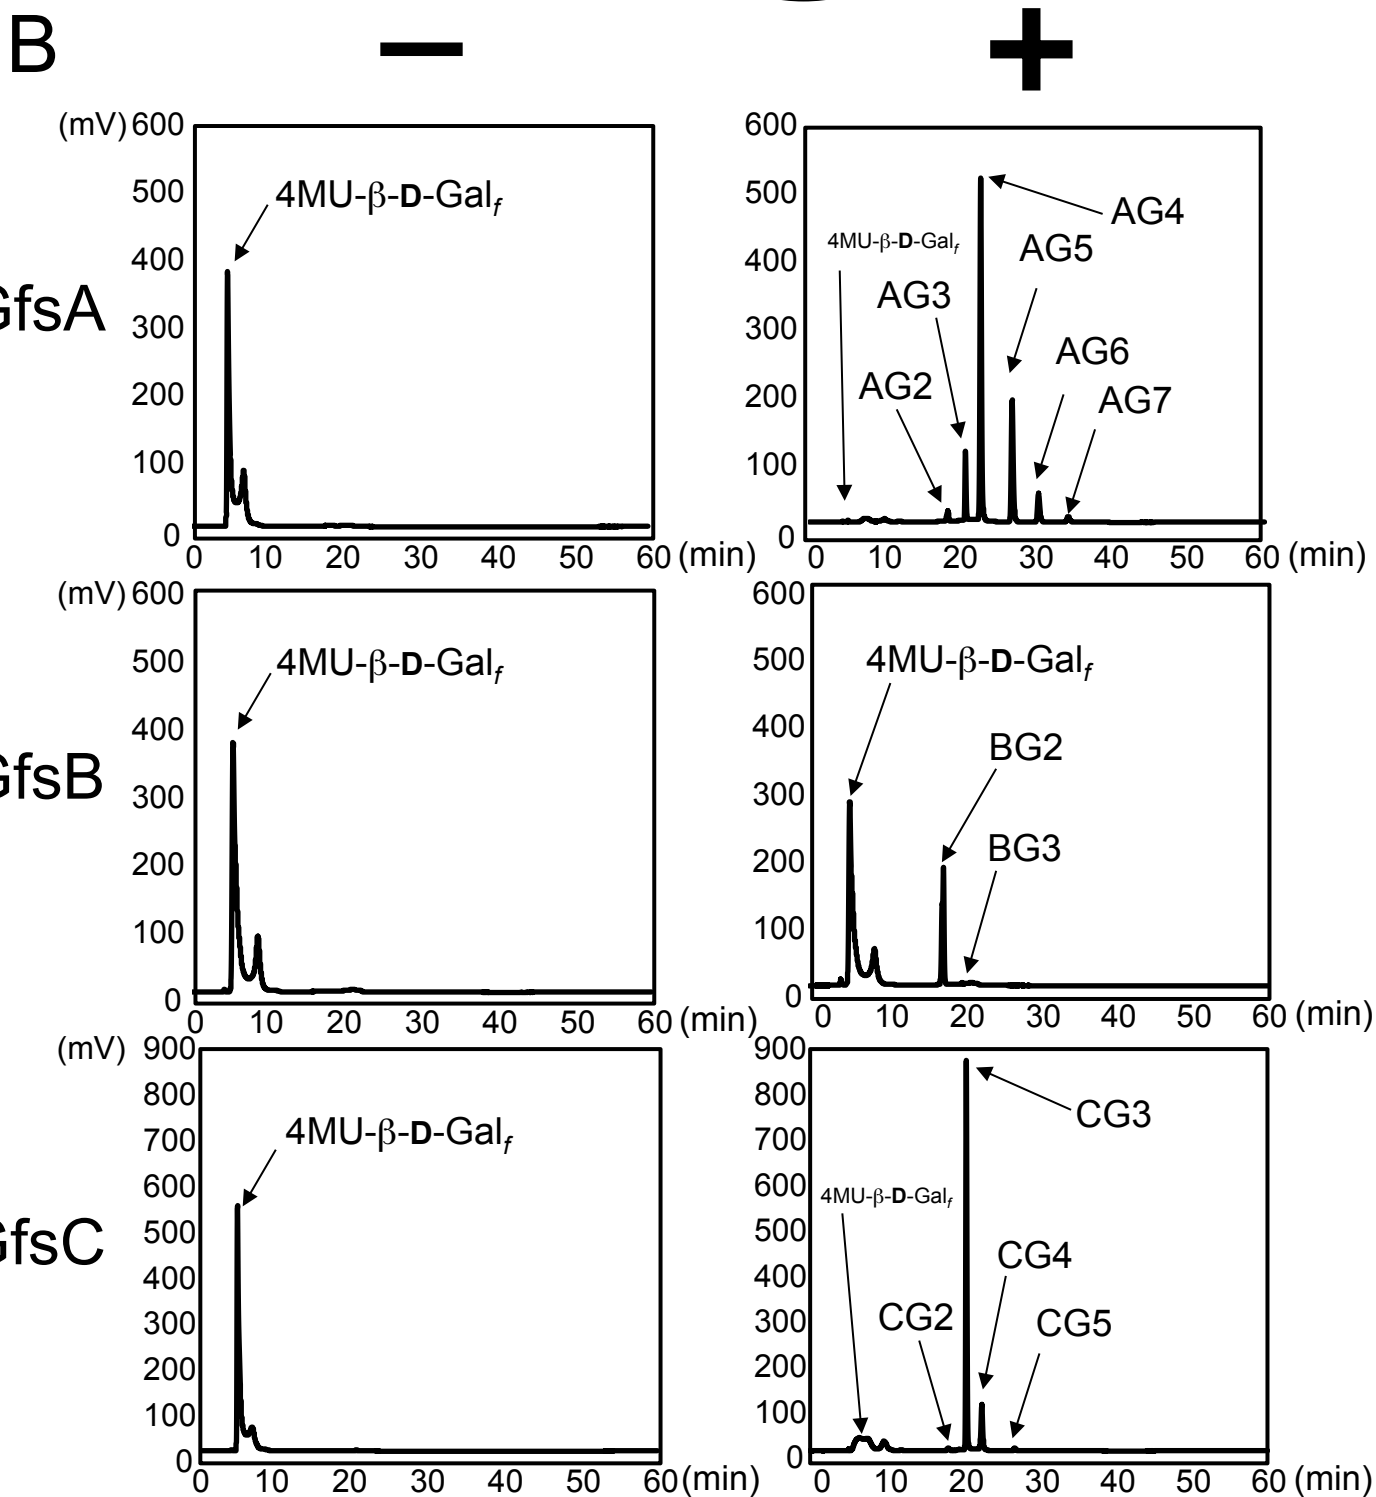

Fig. 1

**GfsA**

**4MU-Gal<sub>f</sub>**

**AG3**

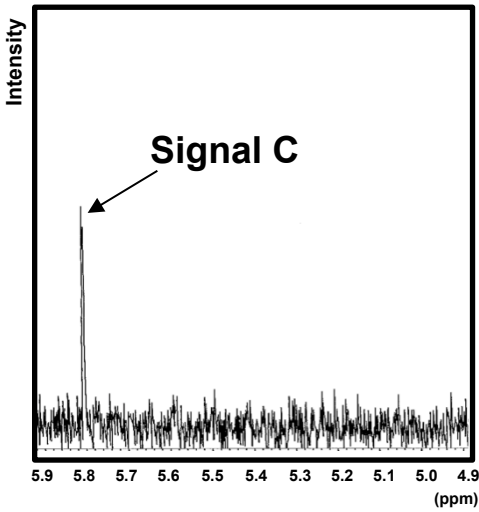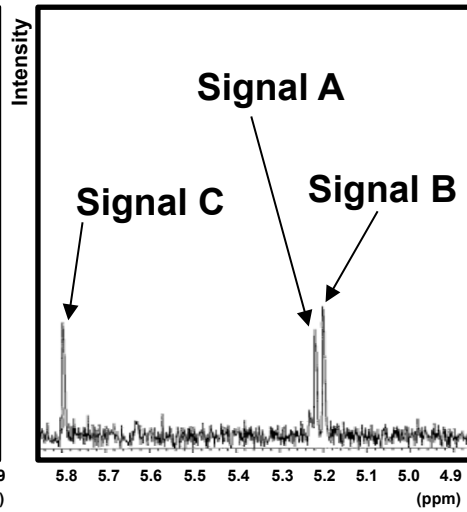

**GfsB**

**GfsC**

**BG2**

**CG3**

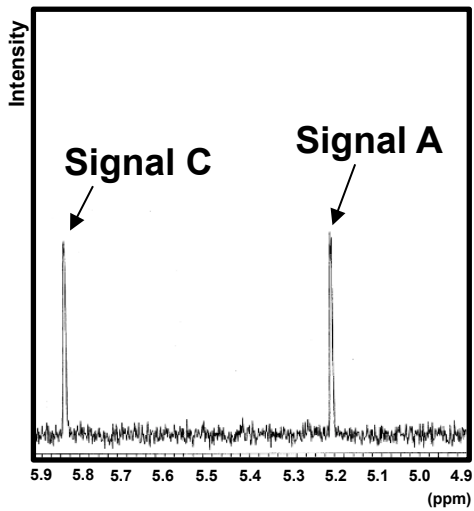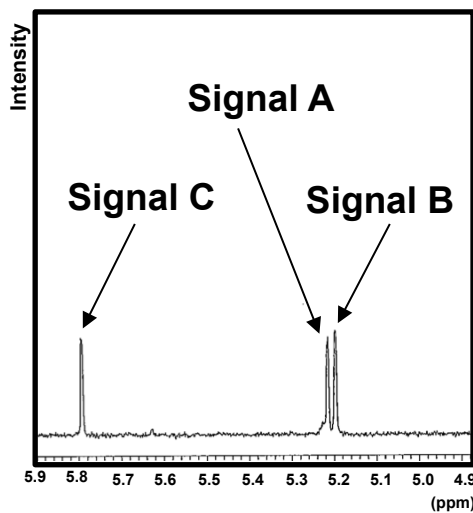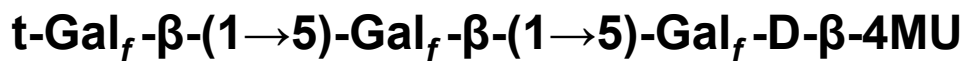

**Signal A**

**Signal B**

**Signal C**

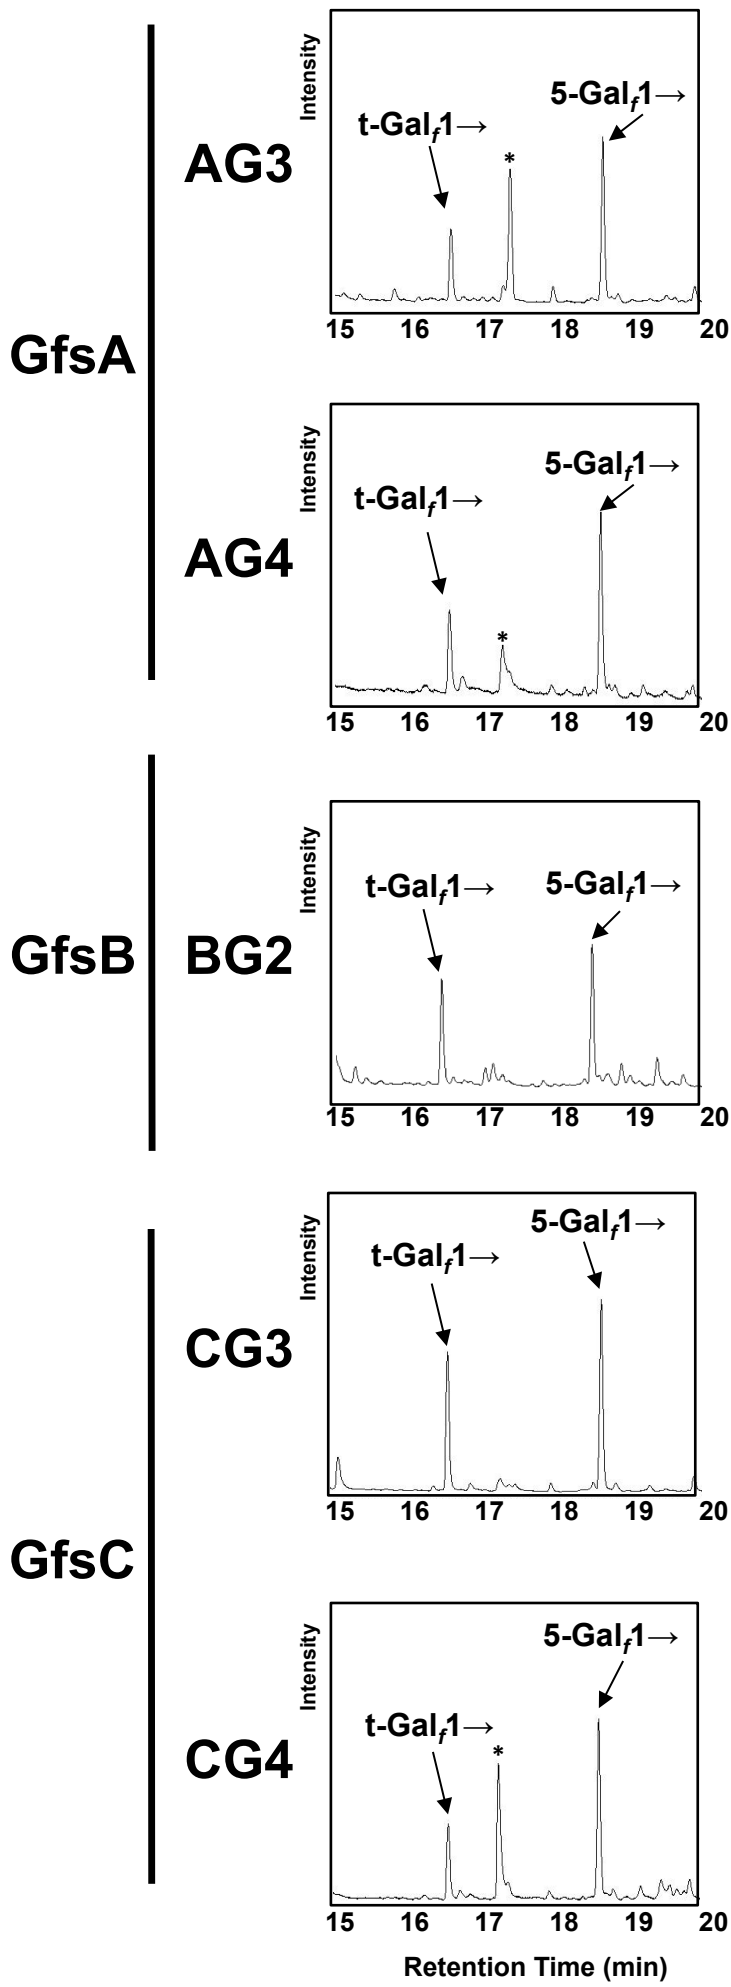

Fig. 3

# $^{13}\text{C}$ -NMR

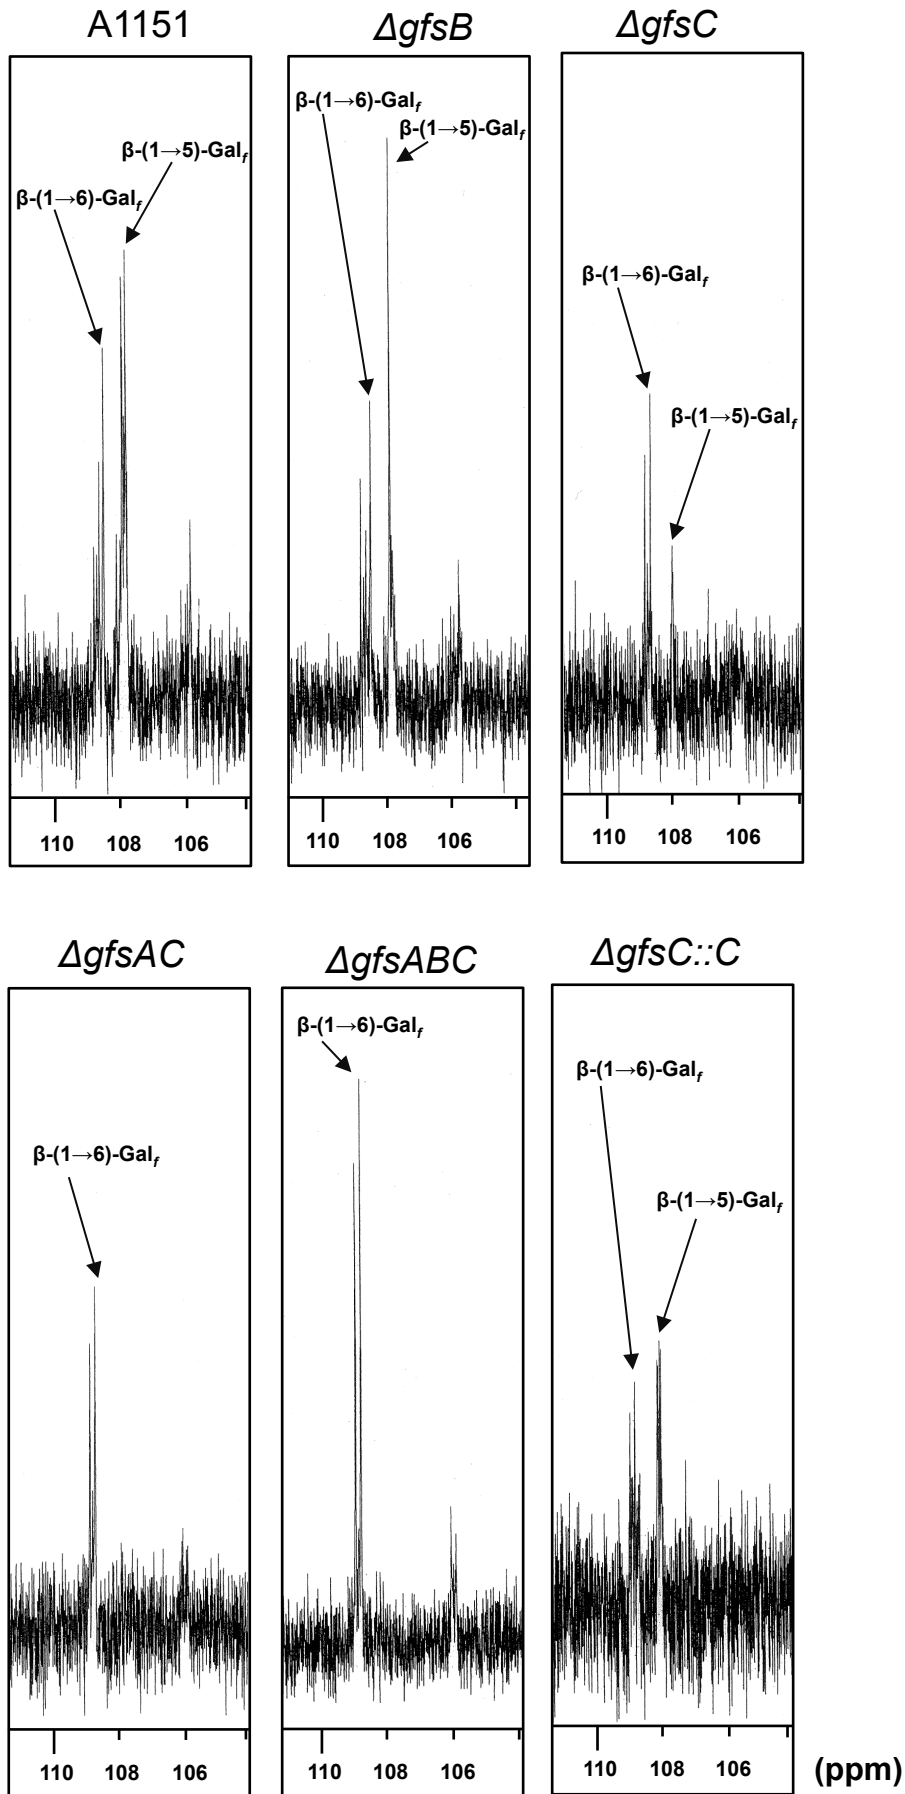

Fig. 4



Dextran

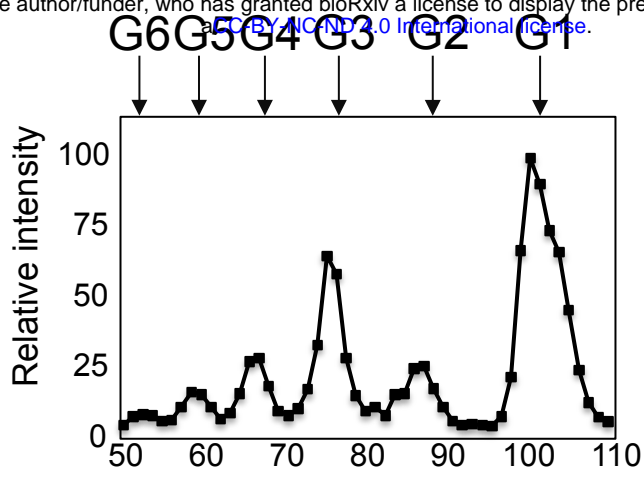

A1151

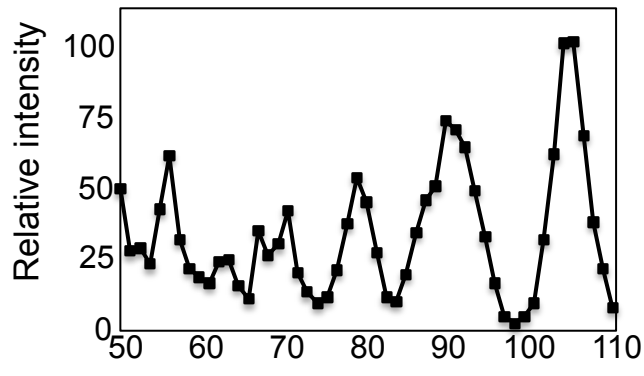

$\Delta gfsA$

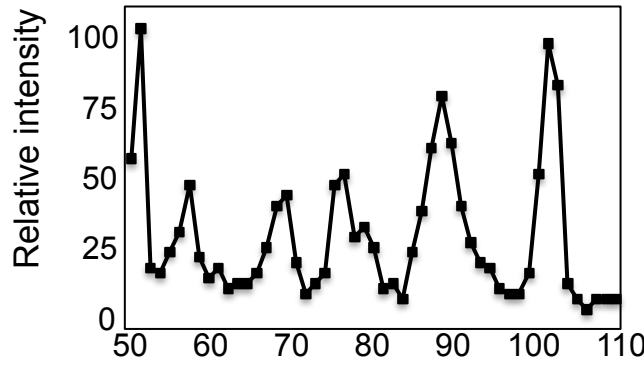

$\Delta gfsC$

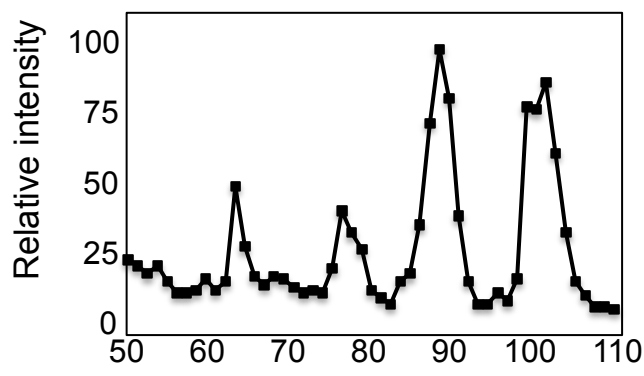

$\Delta gfsAC$

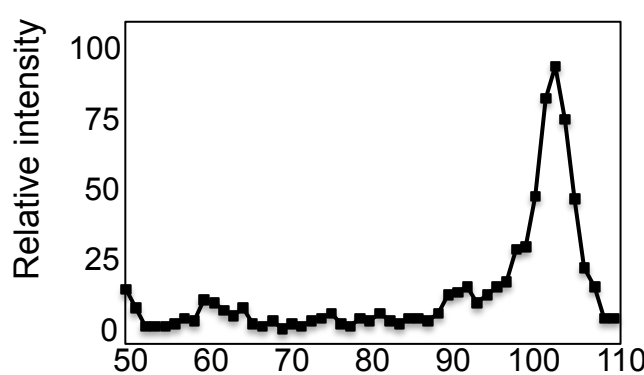

(Fraction No.)

Fig. 5

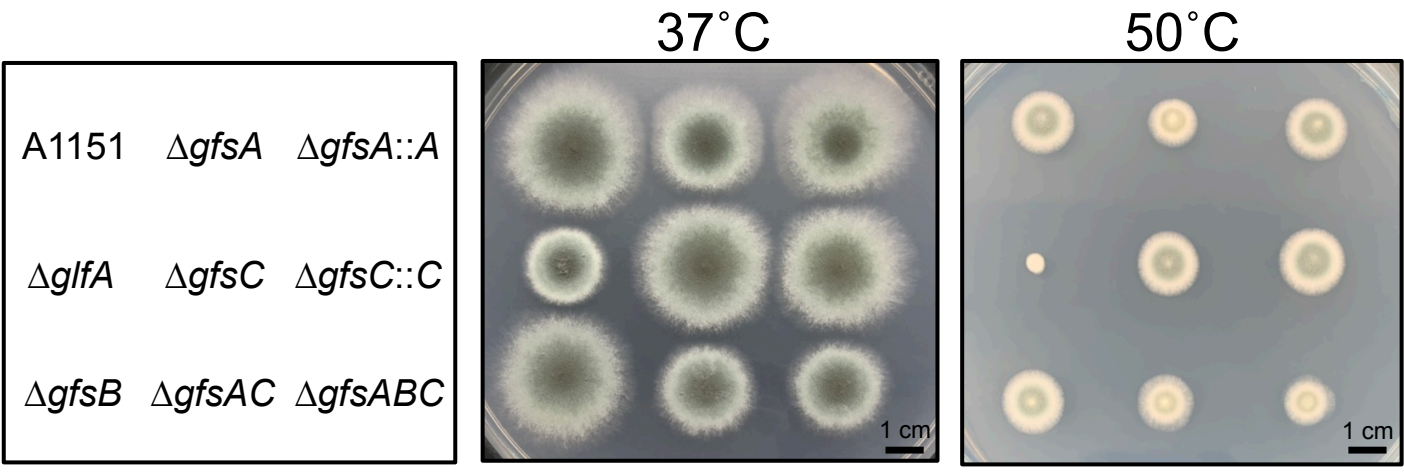

Fig. 6

**A**

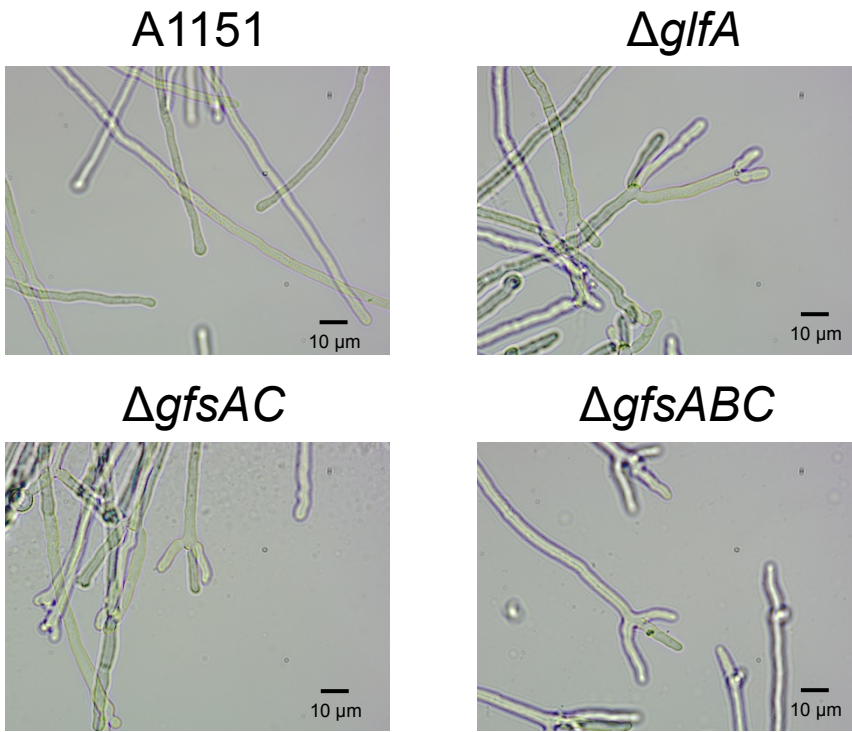

**B**

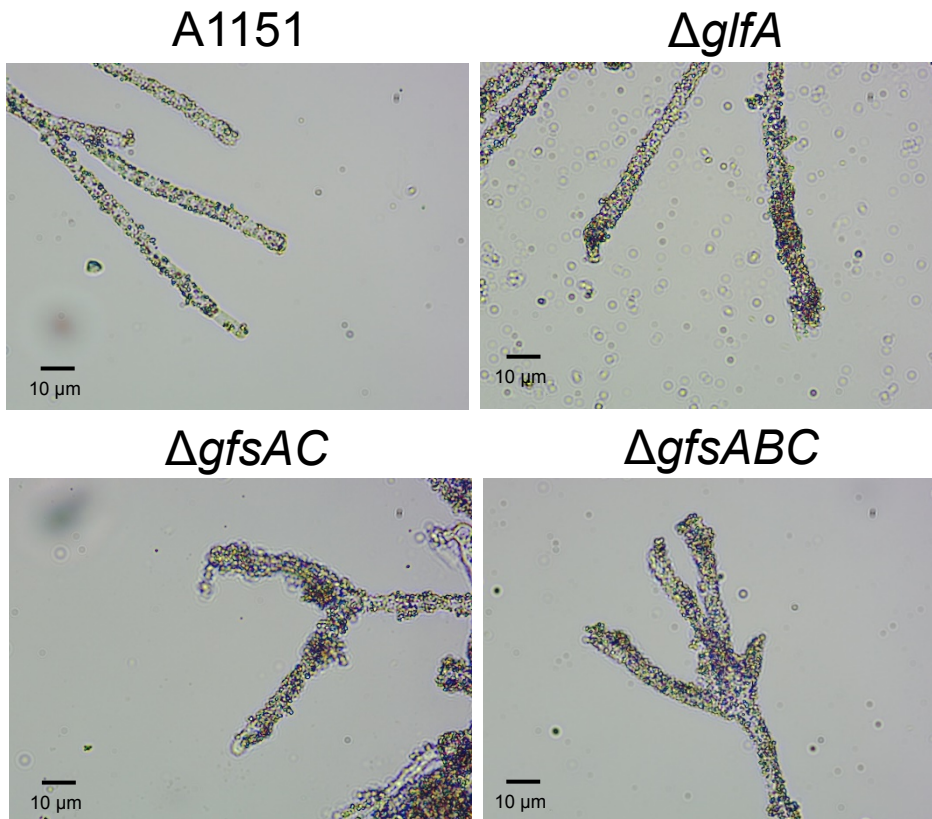

**Fig. 7**

**A**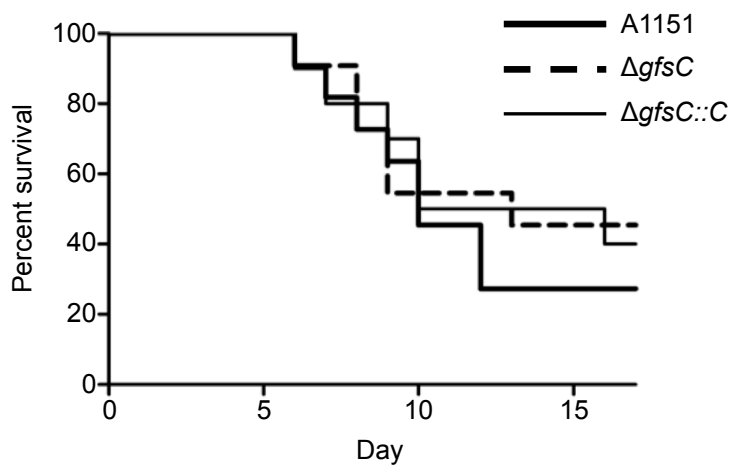**B**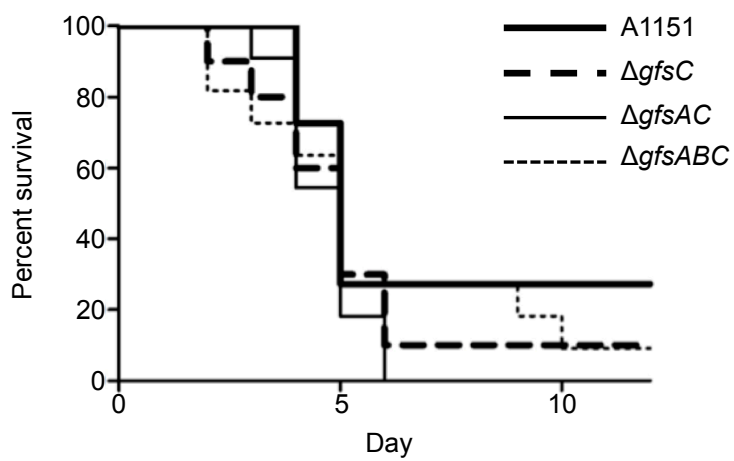**Fig. 8**

Fungal-type galactomannan (FTGM)

O-mannose-type galactomannan (OMGM)

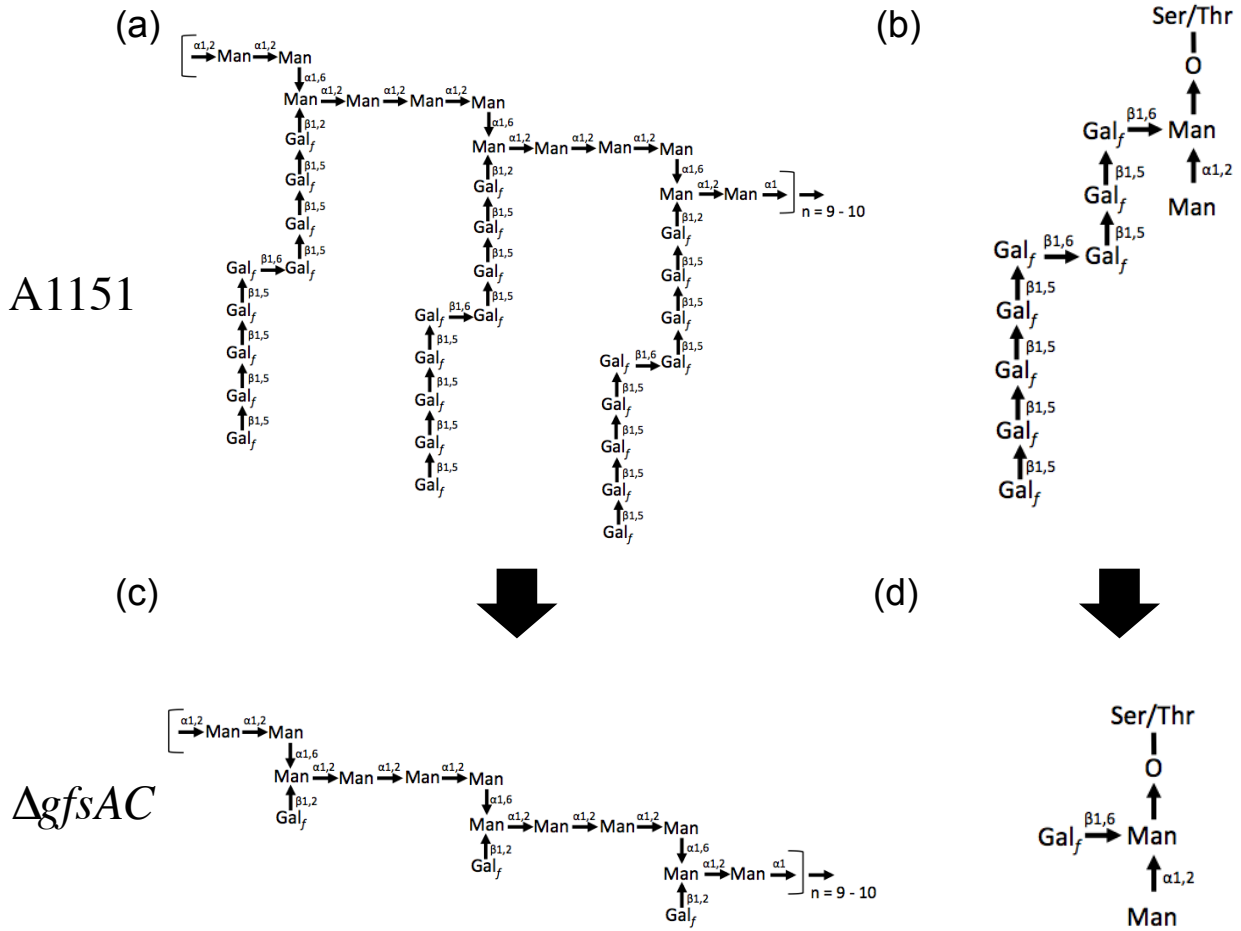

Fig. 9

# CBB

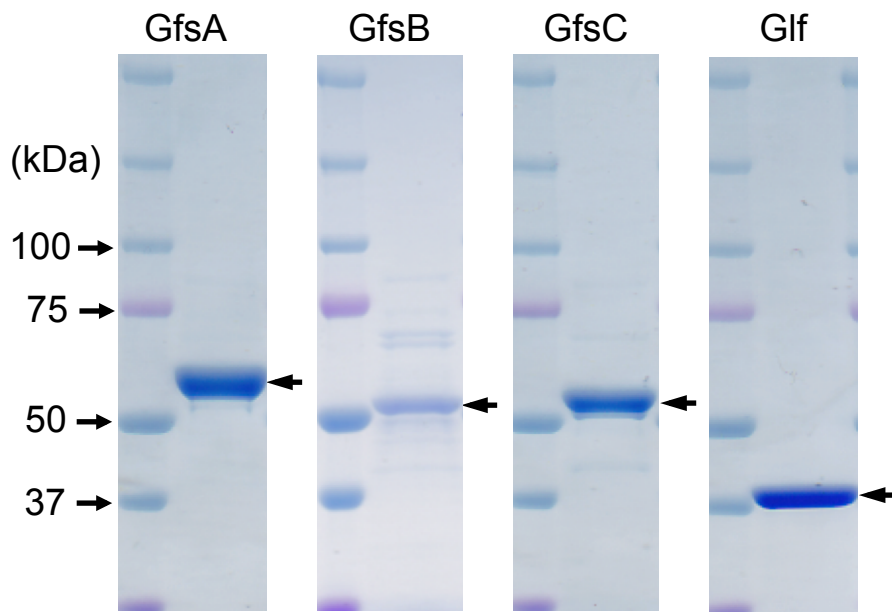

Fig. S1

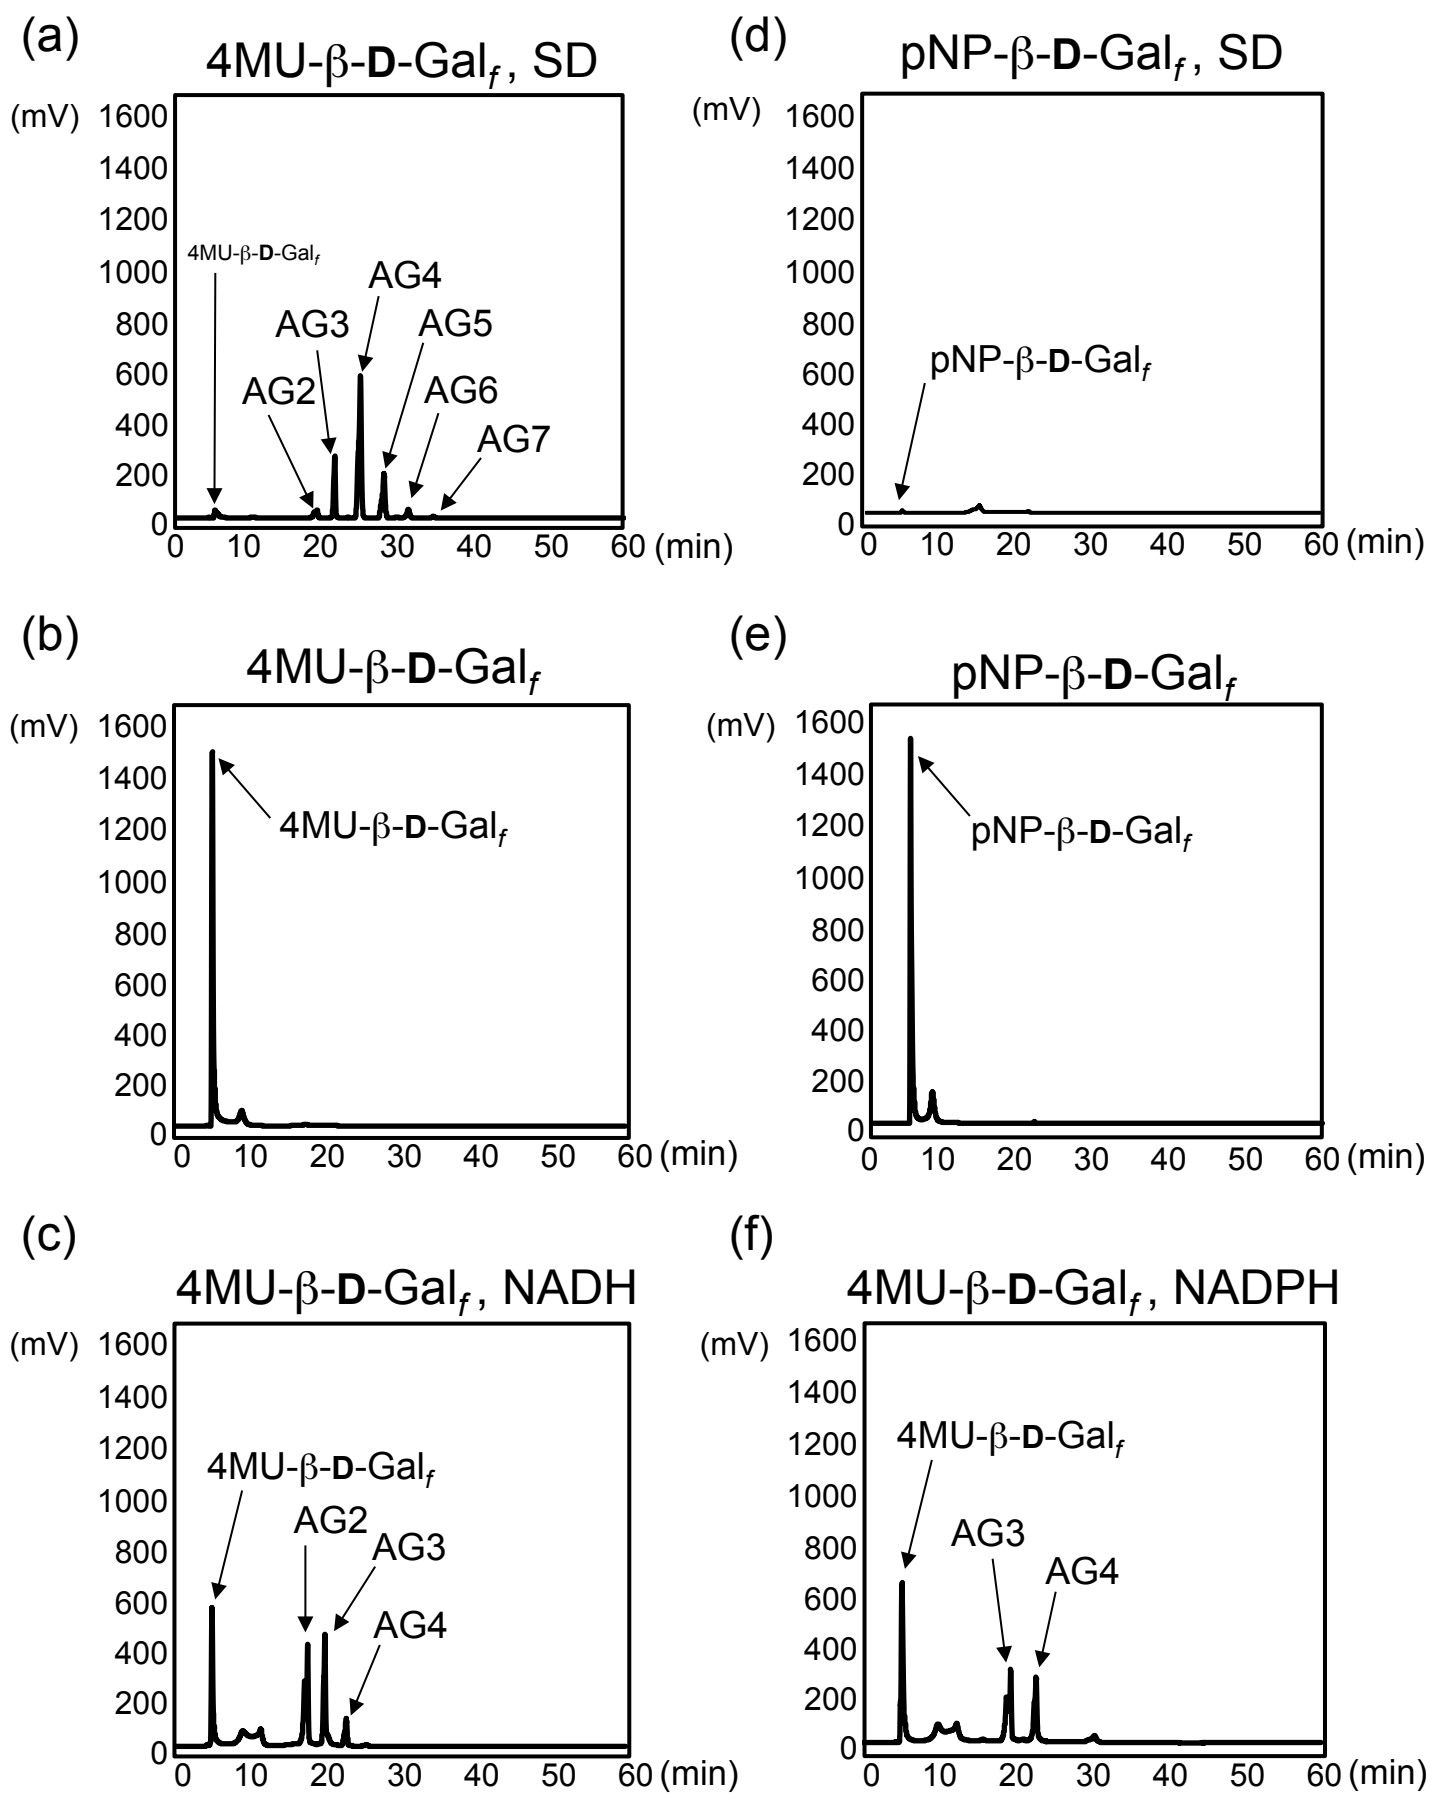

Fig. S2

(a)  $\Delta gfsB$

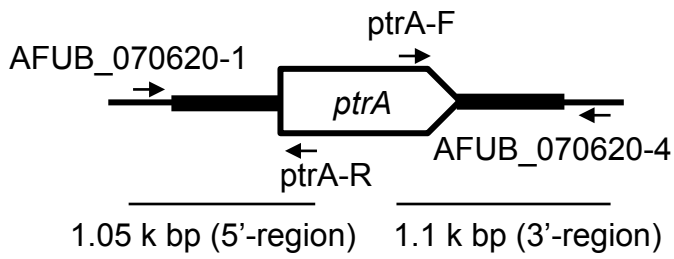

(b)  $\Delta gfsC$

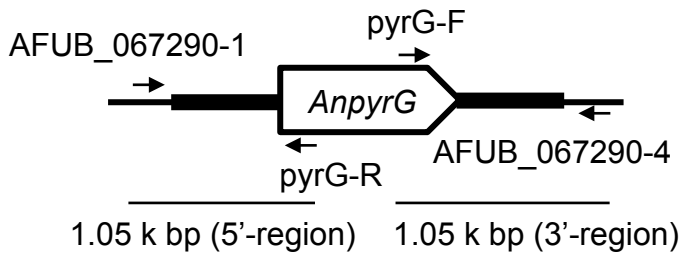

(c)

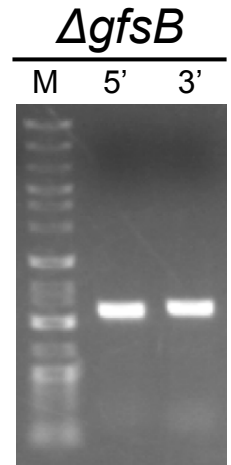

(d)

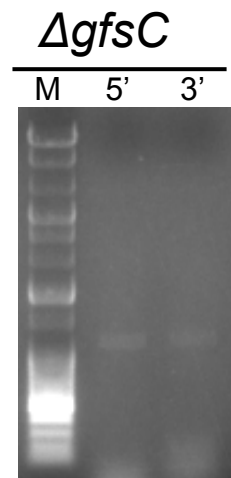

Fig. S3



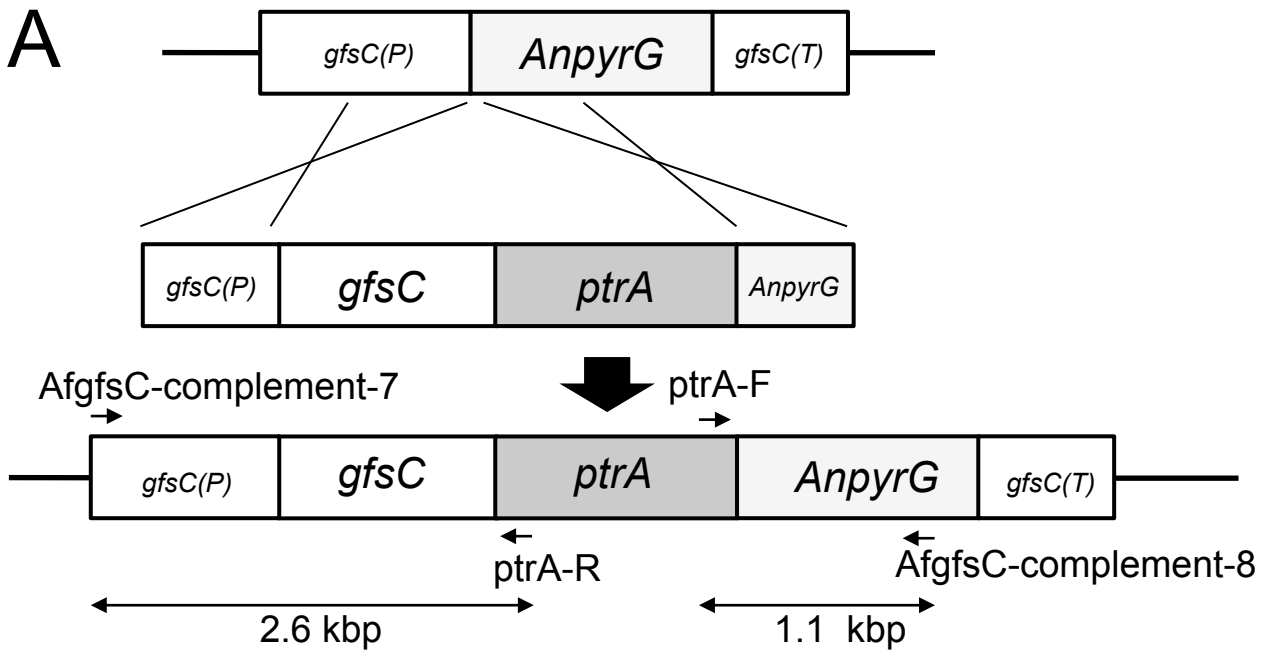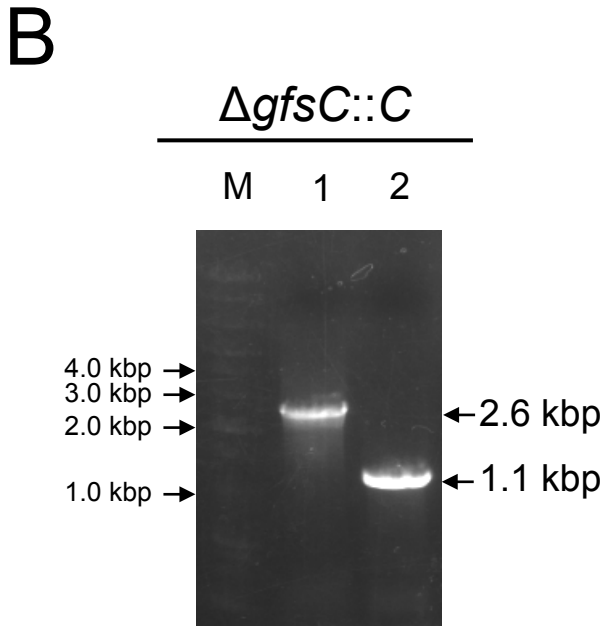

Fig. S4

(a)  $\Delta gfsAC$

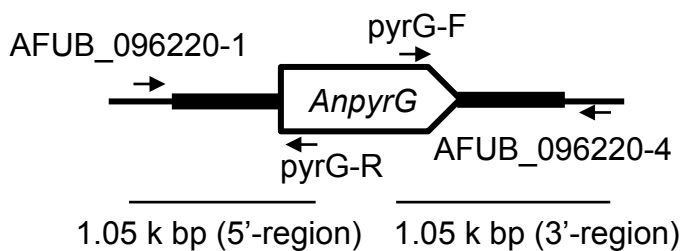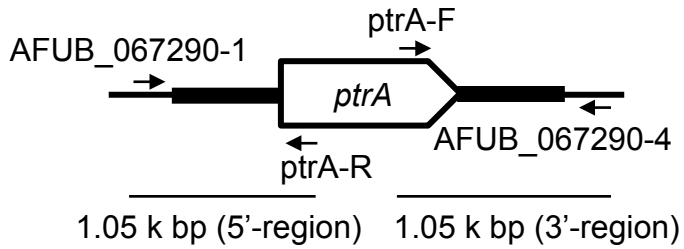

(c)

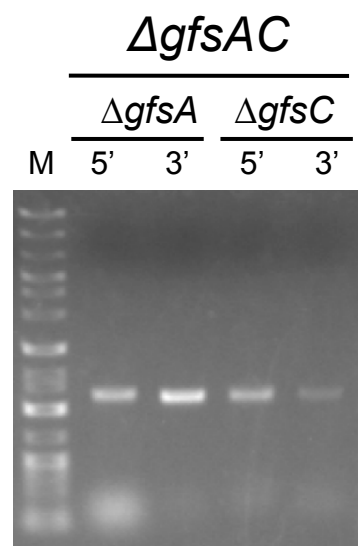

(b)  $\Delta gfsABC$

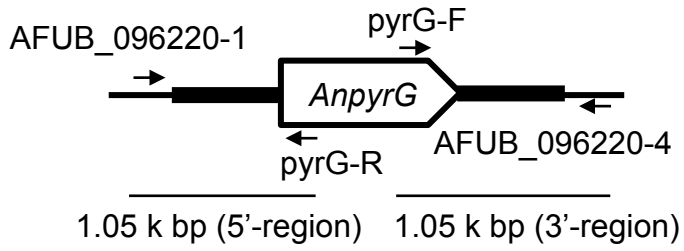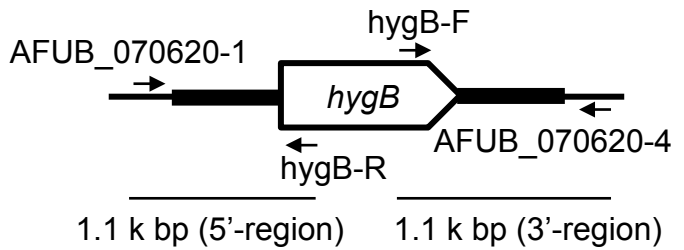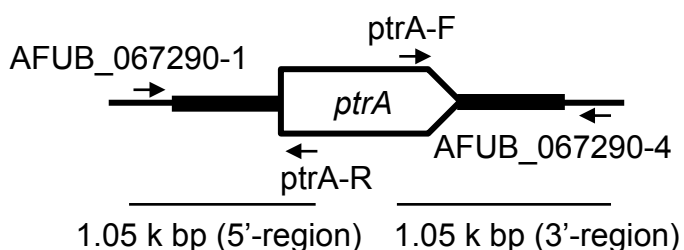

(d)

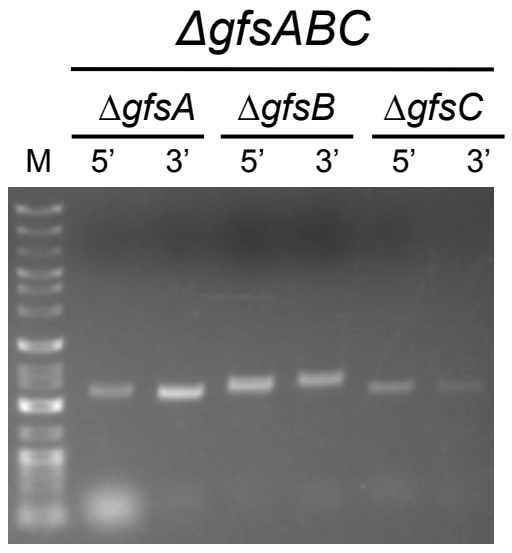

Fig. S5

**Table 1. List of mass-to-charge ratios ( $m/z$ ) of enzymatic products of GfsA, GfsB, and GfsC identified by LC/MS.**

|      | Product name        | Molecular mass (calculated) | Mass spectrum [M - H] <sup>+</sup> ( $m/z$ ) | Suggested structure                                                                                                                                                                                                                                                                                                               |
|------|---------------------|-----------------------------|----------------------------------------------|-----------------------------------------------------------------------------------------------------------------------------------------------------------------------------------------------------------------------------------------------------------------------------------------------------------------------------------|
|      | 4MU- $\beta$ -D-Gal | 338.31                      | 339.11                                       |                                                                                                                                                                                                                                                                                                                                   |
| GfsA | AG2                 | 500.45                      | 501.16                                       | Gal <sub>7</sub> - $\beta$ -(1 $\rightarrow$ 5)-Gal <sub>7</sub> -D- $\beta$ -4MU                                                                                                                                                                                                                                                 |
|      | AG3                 | 662.59                      | 663.21                                       | Gal <sub>7</sub> - $\beta$ -(1 $\rightarrow$ 5)-Gal <sub>7</sub> - $\beta$ -(1 $\rightarrow$ 5)-Gal <sub>7</sub> -D- $\beta$ -4MU                                                                                                                                                                                                 |
|      | AG4                 | 824.73                      | 825.27                                       | Gal <sub>7</sub> - $\beta$ -(1 $\rightarrow$ 5)-Gal <sub>7</sub> - $\beta$ -(1 $\rightarrow$ 5)-Gal <sub>7</sub> - $\beta$ -(1 $\rightarrow$ 5)-Gal <sub>7</sub> -D- $\beta$ -4MU                                                                                                                                                 |
|      | AG5                 | 986.87                      | 987.32                                       | Gal <sub>7</sub> - $\beta$ -(1 $\rightarrow$ 5)-Gal <sub>7</sub> -D- $\beta$ -4MU                                                                                                 |
|      | AG6                 | 1149.01                     | 1149.37                                      | Gal <sub>7</sub> - $\beta$ -(1 $\rightarrow$ 5)-Gal <sub>7</sub> -D- $\beta$ -4MU                                                 |
|      | AG7                 | 1311.15                     | 1311.42                                      | Gal <sub>7</sub> - $\beta$ -(1 $\rightarrow$ 5)-Gal <sub>7</sub> -D- $\beta$ -4MU |
| GfsB | BG2                 | 500.45                      | 501.16                                       | Gal <sub>7</sub> - $\beta$ -(1 $\rightarrow$ 5)-Gal <sub>7</sub> -D- $\beta$ -4MU                                                                                                                                                                                                                                                 |
|      | BG3                 | 662.59                      | 663.22                                       | Gal <sub>7</sub> - $\beta$ -(1 $\rightarrow$ 5)-Gal <sub>7</sub> - $\beta$ -(1 $\rightarrow$ 5)-Gal <sub>7</sub> -D- $\beta$ -4MU                                                                                                                                                                                                 |
| GfsC | CG2                 | 500.45                      | 501.16                                       | Gal <sub>7</sub> - $\beta$ -(1 $\rightarrow$ 5)-Gal <sub>7</sub> -D- $\beta$ -4MU                                                                                                                                                                                                                                                 |
|      | CG3                 | 662.59                      | 663.21                                       | Gal <sub>7</sub> - $\beta$ -(1 $\rightarrow$ 5)-Gal <sub>7</sub> - $\beta$ -(1 $\rightarrow$ 5)-Gal <sub>7</sub> -D- $\beta$ -4MU                                                                                                                                                                                                 |
|      | CG4                 | 824.73                      | 825.27                                       | Gal <sub>7</sub> - $\beta$ -(1 $\rightarrow$ 5)-Gal <sub>7</sub> - $\beta$ -(1 $\rightarrow$ 5)-Gal <sub>7</sub> - $\beta$ -(1 $\rightarrow$ 5)-Gal <sub>7</sub> -D- $\beta$ -4MU                                                                                                                                                 |
|      | CG5                 | 986.87                      | 987.32                                       | Gal <sub>7</sub> - $\beta$ -(1 $\rightarrow$ 5)-Gal <sub>7</sub> -D- $\beta$ -4MU                                                                                                 |

Products of GfsA were AG2, AG3, AG4, AG5, AG6, and AG7; those of GfsB were BG2 and BG3; and for GfsC were CG2, CG3, CG4, and CG5. Mass-to-charge ratios ( $m/z$ ) of the products were determined by LC/MS with positive ion mode electrospray ionization (ESI).

**Table 2. GC-MS analysis of O-methylalditol acetates derived from methylation analyses of galactomannans.**

| <i>O</i> -methylalditol acetate | Sugar linkage           | A1151        | $\Delta gfsB$ | $\Delta gfsC$ | $\Delta gfsAC$ | $\Delta gfsABC$ | $\Delta gfsC::C$ |
|---------------------------------|-------------------------|--------------|---------------|---------------|----------------|-----------------|------------------|
| 2,3,4,6-Me4-Man                 | tMan <sub>p</sub> 1→    | 17.01 ± 1.05 | 21.19 ± 3.48  | 22.89 ± 2.96  | 26.50 ± 1.00   | 23.13 ± 5.45    | 16.32 ± 1.83     |
| 3,4,6-Me3-Man                   | 2-Man <sub>p</sub> 1→   | 29.80 ± 2.28 | 27.89 ± 2.34  | 26.69 ± 1.25  | 25.23 ± 5.11   | 25.04 ± 2.39    | 21.35 ± 3.15     |
| 2,3,4-Me3-Man                   | 6-Man <sub>p</sub> 1→   | 12.95 ± 1.66 | 12.76 ± 1.54  | 16.42 ± 1.09  | 16.80 ± 1.87   | 16.39 ± 1.24    | 8.50 ± 0.74      |
| 3,4-Me2-Man                     | 2,6-Man <sub>p</sub> 1→ | 8.36 ± 0.86  | 7.14 ± 1.33   | 8.25 ± 1.28   | 7.62 ± 0.92    | 8.99 ± 1.26     | 4.06 ± 0.40      |
| 2,3,5,6-Me4-Gal                 | tGal <sub>p</sub> 1→    | 13.76 ± 3.33 | 14.29 ± 2.04  | 19.97 ± 1.27  | 20.94 ± 2.35   | 22.77 ± 1.09    | 26.86 ± 1.51     |
| 2,3,6-Me3-Gal                   | 5-Gal <sub>p</sub> 1→   | 16.31 ± 0.84 | 15.37 ± 0.71  | 2.16 ± 0.19   | N. D.          | N. D.           | 20.18 ± 2.12     |
| 2,3,5-Me3-Gal                   | 6-Gal <sub>p</sub> 1→   | 1.81 ± 0.70  | 1.34 ± 0.24   | 3.62 ± 0.44   | 2.91 ± 0.68    | 3.68 ± 0.51     | 2.73 ± 0.87      |

**Table 3 Colony growth rate of the WT,  $\Delta gfsA$ ,  $\Delta gfsB$ ,  $\Delta gfsC$ ,  $\Delta gfsAC$ ,  $\Delta gfsABC$ ,  $\Delta gfsA::A$ , and  $\Delta gfsC::C$  strains.**

|      | A1151                 | $\Delta gfsA$          | $\Delta gfsB$           | $\Delta gfsC$           | $\Delta gfsAC$         | $\Delta gfsABC$        | $\Delta gfsA::A$        | $\Delta gfsC::C$        |
|------|-----------------------|------------------------|-------------------------|-------------------------|------------------------|------------------------|-------------------------|-------------------------|
| 37°C | 0.75 ± 0.06<br>(100%) | 0.63 ± 0.04<br>(85.2%) | 0.73 ± 0.10<br>(98.6%)  | 0.76 ± 0.08<br>(102.0%) | 0.51 ± 0.03<br>(68.4%) | 0.50 ± 0.05<br>(67.8%) | 0.78 ± 0.04<br>(104.1%) | 0.76 ± 0.06<br>(101.9%) |
| 50°C | 0.30 ± 0.04<br>(100%) | 0.24 ± 0.03<br>(81.2%) | 0.30 ± 0.03<br>(100.5%) | 0.27 ± 0.11<br>(90.9%)  | 0.26 ± 0.03<br>(86.4%) | 0.25 ± 0.03<br>(84.0%) | 0.31 ± 0.03<br>(103.2%) | 0.37 ± 0.03<br>(124.3%) |

**Table 4** Number of formed conidia of the WT,  $\Delta gfsA$ ,  $\Delta gfsB$ ,  $\Delta gfsC$ ,  $\Delta gfsAC$ ,  $\Delta gfsABC$ ,  $\Delta gfsA::A$ , and  $\Delta gfsC::C$  strains.

| Strain name        | Number of formed conidia (conidia/mm <sup>2</sup> ) | Percentage of formed conidia to WT strain |
|--------------------|-----------------------------------------------------|-------------------------------------------|
| A1151              | $3.1 \times 10^5 \pm 9.6 \times 10^4$               | 100%                                      |
| $\Delta AfgfsA$    | $1.6 \times 10^5 \pm 9.1 \times 10^3$               | 50.9%                                     |
| $\Delta AfgfsB$    | $3.0 \times 10^5 \pm 5.2 \times 10^4$               | 95.9%                                     |
| $\Delta AfgfsC$    | $2.8 \times 10^5 \pm 3.0 \times 10^4$               | 90.9%                                     |
| $\Delta AfgfsAC$   | $1.0 \times 10^5 \pm 5.7 \times 10^3$               | 32.1%                                     |
| $\Delta AfgfsABC$  | $7.9 \times 10^4 \pm 3.5 \times 10^3$               | 25.4%                                     |
| $\Delta AfgfsA::A$ | $2.6 \times 10^5 \pm 3.5 \times 10^4$               | 82.6%                                     |
| $\Delta AfgfsC::C$ | $3.8 \times 10^5 \pm 3.4 \times 10^4$               | 120.3%                                    |

**Table 5 Sensitivity of the WT,  $\Delta cmsA$ ,  $\Delta cmsB$ , and  $\Delta cmsAB$  strains to antifungal agents ( $\mu\text{g/mL}$ ).**

|                   | MCFG  | CPFG | AMPH-B | 5-FC | FLCZ | ITCZ     | VRCZ  | MCZ |
|-------------------|-------|------|--------|------|------|----------|-------|-----|
| A1151             | 0.015 | 0.25 | 1      | >64  | >64  | 0.5      | 0.5   | 2   |
| $\Delta AfgfsC$   | 0.015 | 0.25 | 1      | >64  | >64  | 0.5      | 0.5   | 1-2 |
| $\Delta AfgfsAC$  | 0.015 | 0.25 | 1      | >64  | >64  | 0.25-0.5 | 0.5-1 | 1-2 |
| $\Delta AfgfsABC$ | 0.015 | 0.25 | 0.5    | >64  | >64  | 0.5      | 0.5   | 1   |

micafungin (MCFG), caspofungin (CPFG), amphotericin B (AMPH-B), flucytosine (5-FC), fluconazole (FLCZ), itraconazole (ITCZ), voriconazole (VRCZ), and miconazole (MCZ).

**Table S1 *Aspergillus* strains used in this study**

| Strains                                     | Genotype                                                                                  | Source of reference           |
|---------------------------------------------|-------------------------------------------------------------------------------------------|-------------------------------|
| <i>A. fumigatus</i> A1151                   | <i>KU80::pyrG</i>                                                                         | da Silva Ferreira, 2006; FGSC |
| <i>A. fumigatus</i> A1160                   | <i>KU80::pyrG, pyrG</i>                                                                   | da Silva Ferreira, 2006; FGSC |
| <i>A. fumigatus</i> $\Delta$ <i>glfA</i>    | <i>KU80::AfpyrG, glfA::ptrA</i>                                                           | Komachi, 2013 (ref)           |
| <i>A. fumigatus</i> $\Delta$ <i>gfsA</i>    | <i>KU80::AfpyrG, pyrG, AfgfsA::AnpyrG</i>                                                 | Komachi, 2013 (ref)           |
| <i>A. fumigatus</i> $\Delta$ <i>gfsB</i>    | <i>KU80::AfpyrG, AfgfsB::ptrA</i>                                                         | This study                    |
| <i>A. fumigatus</i> $\Delta$ <i>gfsC</i>    | <i>KU80::AfpyrG, pyrG, AfgfsC::AnpyrG</i>                                                 | This study                    |
| <i>A. fumigatus</i> $\Delta$ <i>gfsAC</i>   | <i>KU80::AfpyrG, pyrG-, AfgfsA::AnpyrG, AfgfsC::ptrA</i>                                  | This study                    |
| <i>A. fumigatus</i> $\Delta$ <i>gfsABC</i>  | <i>KU80::AfpyrG, pyrG-, AfgfsA::AnpyrG, AfgfsB::hph, AfgfsC::ptrA</i>                     | This study                    |
| <i>A. fumigatus</i> $\Delta$ <i>gfsA::A</i> | <i>KU80::pyrG, AfgfsA::AnpyrG, <math>\Delta</math>AfgfsA::AfgfsA-<i>ptrA</i></i>          | Katafuchi, 2017 (ref)         |
| <i>A. fumigatus</i> $\Delta$ <i>gfsC::C</i> | <i>KU80::AfpyrG, pyrG-, AfgfsC::AnpyrG, <math>\Delta</math>AfgfsC::AfgfsC-<i>ptrA</i></i> | This study                    |



**Table S2 Oligonucleotides used in this study**

| Oligonucleotide primers            | Sequence                                            |
|------------------------------------|-----------------------------------------------------|
| AFUB_070620-1                      | 5'- CCGTCGTCATTCACAGAGC -3'                         |
| AFUB_070620-2                      | 5'- TCGTTACCAATGGGATCCCCTTAGATGTCGCCTGCTTGCGAG -3'  |
| AFUB_070620-3                      | 5'- ATGCAAGAGCGGCTCATCGCCCTTCTGTCCGAGTTCCTT -3'     |
| AFUB_070620-2( <i>gfsB::hph</i> )  | 5'- GGAAGATCCAGGCACCGGGTTAGATGTCGCCTGCTTGCGAG -3'   |
| AFUB_070620-3( <i>gfsB::hph</i> )  | 5'- AAAACGCGTTTCGGGTTTACCCGCCTTCTGTCCGAGTTCCTT -3'  |
| AFUB_070620-4                      | 5'- TAGCCGGGGTGGAAATTCG -3'                         |
| AFUB_070620-7                      | 5'- AGCTTTGAGCGTTTCTTGGG -3'                        |
| AFUB_070620-8                      | 5'- GCTTCAGTGCCAACGAGAGTG -3'                       |
| AFUB_067290-1                      | 5'- TTCGTAGTCGTTGGAACCTCC -3'                       |
| AFUB_067290-2                      | 5'- GCGGTGATAGCGTTGAAGGGGTATGTGTTCCGCTTCCCTCG -3'   |
| AFUB_067290-3                      | 5'- AGGTTCCCTTTGTGGCTGGGACCCACACTGAGATGATTTGTGG -3' |
| AFUB_067290-2( <i>gfsC::ptrA</i> ) | 5'- TCGTTACCAATGGGATCCCCTAGTGTGTTCCGCTTCCCTCG -3'   |
| AFUB_067290-3( <i>gfsC::ptrA</i> ) | 5'- ATGCAAGAGCGGCTCATCGCCACACTGAGATGATTTGTGG -3'    |
| AFUB_067290-4                      | 5'- TGCCGCTTCTGTTCCTGTC -3'                         |
| AFUB_067290-7                      | 5'- TTGTCTTTGCCACTGTCGTTTC -3'                      |
| AFUB_067290-8                      | 5'- GCATATCCCATCCCCATGAC -3'                        |
| AFUB_096220-1                      | 5'- TACGCCGCTTGCTACTTGG -3'                         |
| AFUB_096220-4                      | 5'- GCCAAATCAATAGTGCACGC -3'                        |
| AfGfsC-complement-1                | 5'- GGAACTCCTCAATTGTCTAATCG -3'                     |
| AfGfsC-complement-2                | 5'- TCGTTACCAATGGGATCCCCTACGCCATCTCCAGATCAATTC -3'  |
| AfGfsC-complement-3                | 5'- ATGCAAGAGCGGCTCATCGCCCTCAACGCTATCACGCC -3'      |
| AfGfsC-complement-4                | 5'- AGACATGATGGCGGTTCTCC -3'                        |
| AfGfsC-complement-7                | 5'- TTGCCACTGTCGTTTCTCC -3'                         |
| AfGfsC-complement-8                | 5'- AAGCTGGAAGTGGGATGGCT -3'                        |
| pyrG-5                             | 5'- CCCTTCAACGCTATCACGCC -3'                        |
| pyrG-6                             | 5'- TCCAGCCACAAAGGAACCT -3'                         |
| ptrA-5                             | 5'- GGGATCCCATTGGTAACGA -3'                         |
| ptrA-6                             | 5'- CGATGAGCCGCTCTTGCAT -3'                         |
| hph-5                              | 5'- CCGGTGCCTGGATCTTCTCCT -3'                       |
| hph-6                              | 5'- GGTAACCCGAAACGCGTTTTAT -3'                      |
| pyrG-F                             | 5'- GATCTACCCCTTGGAAACGCA -3'                       |
| pyrG-R                             | 5'- GACCATCGTGGGCAATTGGT -3'                        |
| ptrA-F                             | 5'- CATATGTAATGGCTGTGTCCCG -3'                      |
| ptrA-R                             | 5'- TTTAGCTTTGACCGGTGAGC -3'                        |
| hph-F                              | 5'- CCGCGGGATCCACTTAACG -3'                         |
| hph-R                              | 5'- GTCTCTCCGCATGCCAGAAA -3'                        |
| pET50b-AfGfsB-F                    | 5'- ATCATCATCATCATAGCTCCAGACCTGCTAGTCCCTC -3'       |
| pET50b-AfGfsB-R                    | 5'- GTACCGAGCTCCATATCACCCAGATGTAGGTTCCAG -3'        |
| pCold2-AfGfsC-F                    | 5'- ATCATCATCATCATAGCCGCGCCGTGATATGC -3'            |
| pCold2-AfGfsC-R                    | 5'- GTACCGAGCTCCATACTACGCCATCTCCAGATC -3'           |
| pET50b-Amp-F                       | 5'- GAATTAATTCATGAGCGGATA -3'                       |
| pET50b-Amp-R                       | 5'- AACACCCCTTGATTACTGT -3'                         |
| Amp-gene-F                         | 5'- AATACAAGGGGTGTTATGAGTATTCAACATTTCCGT -3'        |
| Amp-gene-R                         | 5'- CTCATGAATTAATCTTACCAATGCTTAATCAGTG -3'          |
